# Supplementary material for: Involvement of CitCHX and CitDIC in Developmental-Related and Postharvest-Hot-Air Driven Citrate Degradation in Citrus Fruits
Source: PLoS One. 2015 Mar 4;10(3):e0119410. doi: 10.1371/journal.pone.0119410 (PMC4349887; doi:10.1371/journal.pone.0119410)
Supplement: S1 Dataset — (XLS) [file pone.0119410.s001.xls]

## Sheet: Table S1 rpkm
geneID	GC001A	GC002A	GC003A	SM001A	SM002A	SM003A
Ciclev10000001m	12.1471	9.02583	13.1186	11.7804	13.4577	13.521
Ciclev10000002m	0.207162	0.413872	0.371627	0.259995	0.362584	0.142199
Ciclev10000004m	2.427	1.81788	1.748	3.17051	1.93525	1.80659
Ciclev10000005m	10.1289	9.89416	10.8203	12.4212	8.62461	11.5319
Ciclev10000006m	14.9669	12.8607	11.8592	18.2964	17.6283	15.2642
Ciclev10000007m	5.14368	4.1256	6.16403	9.64054	6.22563	5.11694
Ciclev10000008m	2.13481	1.26831	0.772906	3.54929	2.91909	1.06849
Ciclev10000009m	8.99633	8.28643	8.44511	8.59654	11.2753	6.91797
Ciclev10000010m	16.8287	18.8907	16.3752	17.8816	25.8349	10.8864
Ciclev10000011m	0.0987204	0.190864	0.132821	0.177766	0.160869	0.169408
Ciclev10000013m	0.607584	1.08071	0.735712	0.33817	0.48404	0.291938
Ciclev10000014m	8.35998	10.9616	12.1152	11.3377	10.5272	7.80255
Ciclev10000015m	0.48555	0.424673	0.699932	0.302798	0.293045	0.27774
Ciclev10000018m	0.726057	1.00267	0.930337	0.721623	0.399074	0.889955
Ciclev10000021m	0.84084	0.788923	0.582279	1.11331	0.582103	0.212193
Ciclev10000022m	6.20314	4.93539	8.30005	4.15793	3.83624	3.65778
Ciclev10000023m	25.1802	25.747	43.6382	29.8141	38.4827	52.0683
Ciclev10000024m	1.93291	2.05774	2.44148	2.58342	2.70232	1.99436
Ciclev10000026m	3.32014	4.47646	2.64493	4.48155	5.37865	3.39849
Ciclev10000027m	17.9492	20.62	19.7823	21.4336	27.113	15.7497
Ciclev10000028m	4.55395	3.50599	2.90451	1.62935	2.96241	4.07115
Ciclev10000029m	2.08197	2.37601	0.875355	4.61527	2.67015	0.521024
Ciclev10000030m	1.32304	2.52819	1.82834	1.03254	2.28407	1.63679
Ciclev10000033m	0.187881	0.484325	0.140433	0.10252	0.198436	0
Ciclev10000034m	49.6584	61.9534	74.0099	56.6594	84.3017	85.6831
Ciclev10000035m	0.670216	0.185111	0.107348	0.783675	0.317819	0.0273836
Ciclev10000036m	0	0	0	0	0	0
Ciclev10000037m	0.1747	0.101328	0	0.0285984	0	0.0299791
Ciclev10000038m	2.97446	1.37234	3.03175	2.98792	3.36597	2.84215
Ciclev10000039m	0.266679	0.515591	1.12124	0.927677	0.422492	1.80192
Ciclev10000043m	0.396116	0.38292	0.471877	0.121583	0.268952	0.233663
Ciclev10000045m	0.0280458	0.298227	0.0314445	0.0918219	0.330068	0.0481275
Ciclev10000047m	0.886862	0.263791	1.07083	1.47971	0.710236	1.14141
Ciclev10000050m	15.4595	14.7659	19.9916	14.4937	20.0174	15.9597
Ciclev10000052m	0.0629845	0.334875	0.247161	0.283541	0.285099	0.216167
Ciclev10000054m	5.36947	3.31804	5.82966	4.81215	3.99954	1.80785
Ciclev10000055m	0.0369732	0	0	0.12105	0.167359	0
Ciclev10000059m	1.27756	1.36852	0.967827	1.75223	1.50042	0.859159
Ciclev10000060m	0.352436	0.715461	0.790293	0.836561	0.542402	0.181438
Ciclev10000062m	20.3403	9.28257	18.2951	39.2981	16.8282	42.8376
Ciclev10000063m	14.2205	13.7771	17.3165	22.2769	20.2343	23.8103
Ciclev10000065m	5.13209	4.86057	6.02618	4.54121	5.49368	5.177
Ciclev10000066m	10.1263	7.42727	3.21548	17.3012	12.8214	4.61767
Ciclev10000067m	0.912369	0.712365	0.511468	0.832941	0.476519	0.421523
Ciclev10000069m	6.1945	6.93365	6.05166	5.95972	6.00142	12.8057
Ciclev10000070m	23.6016	28.6813	24.5282	29.5912	31.3414	19.0723
Ciclev10000072m	0.349488	1.65544	1.13634	0.543507	0.7277	0.479786
Ciclev10000073m	7.95929	6.89192	5.41352	6.57644	6.96649	5.43747
Ciclev10000077m	0.523663	0.614694	0.293562	0.459234	0.0677245	0.0962811
Ciclev10000078m	0.799264	0.888535	0.896123	1.07943	0.904466	0.514336
Ciclev10000079m	3.7263	5.25454	4.06288	4.84079	5.94216	4.16519
Ciclev10000080m	0.196821	0.190264	0.0367788	0.295346	0.178182	0
Ciclev10000081m	26.44	20.8536	12.6037	23.9056	20.1317	11.1777
Ciclev10000082m	13.4892	18.4174	24.6221	14.5228	20.2102	22.3367
Ciclev10000083m	1.05068	0.150472	0	1.62442	0.176145	0
Ciclev10000084m	25.7076	20.2003	17.0683	26.4196	22.623	23.413
Ciclev10000085m	9.26143	13.0352	11.0042	13.0871	15.4504	7.27176
Ciclev10000086m	2.43417	3.12519	2.4733	2.30368	3.58094	1.33798
Ciclev10000087m	41.3015	27.8823	34.8781	44.8059	39.1333	24.7155
Ciclev10000088m	4.30853	6.19588	4.51128	3.49739	7.47866	4.88832
Ciclev10000089m	1.10692	0.118894	0	1.00668	0.185573	0.63317
Ciclev10000092m	2.06099	2.43889	1.6733	2.73397	2.44486	1.9513
Ciclev10000093m	7.54924	6.1804	4.2928	11.412	6.83432	2.72732
Ciclev10000095m	35.1797	34.4892	45.6246	39.1595	41.0258	53.8381
Ciclev10000096m	0.239779	0.463583	0.313643	0.425229	0.470322	0.137156
Ciclev10000097m	0	0	0	0	0	0
Ciclev10000098m	0.551807	0.533426	7.29157	2.25827	1.32024	25.8712
Ciclev10000100m	39.6454	25.9977	23.8027	45.7028	33.8778	36.4313
Ciclev10000102m	26.2549	18.3638	13.1998	25.4977	11.5699	16.9252
Ciclev10000103m	80.6247	96.3476	37.4418	128.501	64.5676	27.9029
Ciclev10000105m	0	0.0361291	0	0.0305907	0	0.0320676
Ciclev10000108m	10.6175	10.115	15.2252	13.319	10.2388	16.9656
Ciclev10000109m	11.7239	5.10001	3.59288	18.8082	5.73136	8.68453
Ciclev10000110m	0.326037	1.41829	2.74161	0.0667154	0.0368952	0.7693
Ciclev10000111m	15.4236	12.4615	10.9116	15.9549	14.9934	6.17734
Ciclev10000115m	5.55546	3.04806	1.68343	8.57199	9.27712	2.12568
Ciclev10000116m	1.49076	2.00881	3.79869	1.70087	3.35352	2.98457
Ciclev10000117m	0	0	0	0	0	0
Ciclev10000118m	17.6192	12.782	12.9537	17.521	19.4662	13.6582
Ciclev10000119m	0	0	0	0.0682487	0.0754861	0
Ciclev10000120m	2.08589	3.32113	3.85192	1.33906	3.33238	3.22852
Ciclev10000121m	14.4286	11.2855	15.5319	14.6024	14.6252	16.1186
Ciclev10000122m	0.606741	0.517526	1.04041	0.964024	1.32474	1.01056
Ciclev10000123m	0.929779	0.856006	0.64533	2.8629	2.0442	0.873744
Ciclev10000125m	0.525731	0.719976	0.343841	1.11164	1.07087	0.300724
Ciclev10000126m	0.0445326	0.258295	0.0998587	0.0729	0.322523	2.29258
Ciclev10000127m	117.572	119.941	125.462	122.225	140.662	87.5147
Ciclev10000128m	2.59334	2.24503	1.21513	3.0731	2.62808	2.82293
Ciclev10000129m	65.2021	60.9139	177.778	40.7199	48.3022	221.052
Ciclev10000130m	0.556112	0.206764	0.671467	0.350137	0.425994	0.477153
Ciclev10000131m	0	0	0	0	0	0.192353
Ciclev10000132m	58.3326	46.3772	68.066	4.11028	4.83029	21.3128
Ciclev10000133m	2.67309	4.44133	3.69946	2.80328	4.61302	4.33625
Ciclev10000134m	1.26138	1.10851	2.18565	2.78447	2.14544	2.19737
Ciclev10000136m	0.0911858	0.132222	0	0.0746357	0.0412752	0.0391195
Ciclev10000138m	1.36547	1.39541	1.70591	0.510919	0.777012	0.736429
Ciclev10000139m	0.873941	0.675863	0.627105	1.05868	0.791178	0.359931
Ciclev10000140m	6.08154	3.22626	4.36553	7.28451	4.19635	4.42263
Ciclev10000141m	0	0	0	0.0355319	0.1179	0.260731
Ciclev10000142m	26.811	27.8255	45.3547	29.3885	32.8157	42.5488
Ciclev10000144m	3.24643	3.02205	1.4829	3.08367	3.33811	0.343888
Ciclev10000146m	3.39828	4.53653	4.49048	5.52987	8.75326	7.11589
Ciclev10000147m	0	0.0418988	0	0	0	0
Ciclev10000148m	1.01068	0.284961	0	0.482556	0.304988	0.0722647
Ciclev10000149m	2.17754	2.2158	3.29808	3.68972	2.87053	5.57233
Ciclev10000150m	2.44456	4.09608	2.42104	2.10092	1.84421	1.04874
Ciclev10000151m	0.1855	0.358642	0.20798	0.037958	0	0.159162
Ciclev10000152m	9.60574	10.5502	17.0484	12.9143	10.1762	15.9577
Ciclev10000154m	35.4914	34.275	35.7182	38.6944	39.9233	41.3496
Ciclev10000155m	41.7225	21.3696	17.4217	94.6148	47.4084	12.6326
Ciclev10000156m	0.779923	0.753942	0.0485799	1.70231	1.29445	0.260239
Ciclev10000159m	1.78203	1.496	0.946416	1.15152	0.934	1.00593
Ciclev10000161m	1.19961	0.919725	2.8755	2.30235	3.29548	5.07546
Ciclev10000162m	0	0.0440014	0	0.0372562	0.370864	0.117165
Ciclev10000167m	9.28699	11.4297	16.3755	6.1615	8.889	10.882
Ciclev10000168m	6.07811	5.76407	4.83066	5.28981	7.73137	5.28113
Ciclev10000171m	0.324844	0.942068	0.36421	0.569754	0.588162	0.238904
Ciclev10000172m	15.6656	22.8663	24.8169	18.5637	14.3232	19.7274
Ciclev10000174m	1.69958	2.40433	3.02098	3.42687	5.70417	0.569079
Ciclev10000175m	6.36648	4.55881	3.66342	3.44641	2.43961	2.10987
Ciclev10000176m	11.6273	5.38846	3.66191	14.5428	5.99244	0.523109
Ciclev10000177m	1.39764	1.31134	0.875684	0.942092	2.00957	1.12866
Ciclev10000178m	1.78877	1.46316	0.925636	1.4078	1.61937	0.855944
Ciclev10000179m	1.37305	0.915386	1.0086	1.00758	0.600078	0.528113
Ciclev10000180m	4.70303	2.76884	1.78409	5.06504	2.68904	1.45634
Ciclev10000182m	5.48107	4.94785	8.35941	14.0525	5.32686	6.84679
Ciclev10000183m	13.5613	8.44836	8.91165	12.4257	19.4386	10.1813
Ciclev10000185m	69.2449	74.8211	60.5418	50.984	73.7918	36.1595
Ciclev10000188m	9.09262	7.02442	5.03328	11.0545	7.43938	3.29692
Ciclev10000190m	1.8779	1.98422	1.6648	0.893643	1.22563	1.19909
Ciclev10000191m	0	0	0	0	0	0
Ciclev10000192m	0.345546	0	0.0860937	0.0942767	0.17379	0
Ciclev10000193m	0.0491176	0.142444	0.27535	0.120608	0.133398	0
Ciclev10000195m	50.7612	28.0178	22.7833	34.756	45.3678	20.8045
Ciclev10000198m	0.541563	0.130881	0.101199	0.0369392	0.0408564	0
Ciclev10000199m	0.991535	0.81473	1.38962	0.89273	0.762991	0.808216
Ciclev10000200m	15.9739	16.6231	20.8947	20.6479	18.7284	25.764
Ciclev10000201m	5.21259	5.58483	4.0423	4.26651	5.15152	3.9507
Ciclev10000202m	10.6895	8.59088	17.6248	12.5235	15.825	20.7893
Ciclev10000203m	0.149699	0	0	0.285901	0	0
Ciclev10000204m	2.8238	3.03303	2.66346	3.30183	2.881	2.1152
Ciclev10000205m	8.88797	6.22172	4.95799	6.70143	7.53099	5.4096
Ciclev10000206m	0.465002	2.38241	1.82474	0.266423	0.631448	0.119694
Ciclev10000207m	5.85179	3.51643	1.95055	9.32049	3.11414	0.508879
Ciclev10000208m	5.25027	3.5899	4.25936	4.50698	4.21207	4.1752
Ciclev10000209m	10.6314	8.0923	15.7209	9.96937	10.0793	12.4618
Ciclev10000213m	10.9754	12.7694	14.9191	10.6131	19.2127	17.3342
Ciclev10000215m	0.903536	1.22928	1.50079	1.39692	1.2421	1.20594
Ciclev10000216m	0.293555	0.378368	0.10971	0.600688	0.398633	0.167917
Ciclev10000217m	0.71911	0.663557	0	2.08683	0.325505	0.0280458
Ciclev10000218m	12.5298	16.5288	17.1419	8.81171	5.81493	11.4494
Ciclev10000220m	4.96642	1.01968	5.12479	5.1802	19.178	94.9546
Ciclev10000221m	0	0	0	0	0	0
Ciclev10000223m	10.5505	5.84215	5.85709	11.025	6.58392	2.24115
Ciclev10000225m	0.762519	0.921398	1.17552	1.91138	1.68263	0.695145
Ciclev10000226m	1.53054	1.27962	1.48413	0.846453	2.05968	1.91661
Ciclev10000227m	0	0.0466831	0	0.0395269	0	0
Ciclev10000228m	0	0	0	0	0.0467477	0
Ciclev10000229m	20.3847	15.6576	12.2248	12.7077	13.6261	9.76207
Ciclev10000230m	7.12134	10.4432	10.4828	6.18569	7.41179	7.60661
Ciclev10000233m	6.52653	5.59934	7.18025	8.44699	6.90552	7.17484
Ciclev10000234m	0.844211	2.23351	0.398534	2.40027	1.40785	0.800594
Ciclev10000235m	1.14512	7.26178	13.9174	5.99863	2.98564	2.39739
Ciclev10000236m	5.32576	2.48541	0.0514756	5.74956	4.98767	2.59994
Ciclev10000237m	7.76062	3.90109	8.15417	4.02903	3.01101	3.4245
Ciclev10000238m	29.3845	26.3946	33.0621	30.8622	26.2722	34.3602
Ciclev10000240m	13.4217	15.659	6.01928	11.2887	3.89658	2.6606
Ciclev10000241m	3.00283	1.78315	0.336674	1.68536	2.25244	0.920172
Ciclev10000243m	44.0355	41.555	30.7105	42.0503	43.2665	22.2651
Ciclev10000247m	1.04215	1.30594	0.562586	0.821411	1.50255	0.397415
Ciclev10000250m	1.86487	1.47497	1.61567	1.97738	1.84174	1.45462
Ciclev10000251m	0.213757	0.051659	0.11983	0.52488	0.0483784	0
Ciclev10000254m	12.8018	18.3529	18.9029	4.6658	6.99741	8.12413
Ciclev10000255m	0.541741	0.299254	0.390466	0.696795	0.350312	0.265613
Ciclev10000256m	6.35001	7.72831	10.961	5.72098	6.41038	8.46661
Ciclev10000257m	0	0.0492354	0	0.125064	0.36887	0.0437005
Ciclev10000260m	34.7603	46.0231	30.3924	57.8587	32.0154	83.8069
Ciclev10000262m	0.348604	0.336992	0.146569	0.321	0	0.373885
Ciclev10000263m	11.7144	12.8282	12.2618	9.85043	9.94222	6.24271
Ciclev10000264m	0.0516378	0.149753	0.52106	0.211328	0.186991	0.0886122
Ciclev10000267m	3.80561	2.83669	3.23865	5.92955	3.90181	2.24242
Ciclev10000268m	0.58205	0.457162	0.815732	1.16124	0.329331	0.374556
Ciclev10000269m	0	0	0	0.178277	0.0492955	0.140163
Ciclev10000271m	21.7376	30.3278	31.4694	25.7549	33.6692	29.5144
Ciclev10000273m	8.14987	4.71699	0.407405	11.3019	5.82727	0.222698
Ciclev10000274m	1.13382	0.745317	1.01698	0.593943	0.697986	0.466963
Ciclev10000275m	0.934028	0.601943	0.116358	2.03868	0.51674	0.623321
Ciclev10000276m	0	0	0	0	0	0.0473379
Ciclev10000277m	4.39397	3.68125	1.91584	4.4756	3.09389	1.38237
Ciclev10000281m	81.836	66.279	64.454	126.123	139.299	27.8302
Ciclev10000286m	6.06262	5.26263	8.09205	10.971	9.29682	9.30667
Ciclev10000287m	0.090231	0	0.202332	0.0738542	0.040843	0.0774197
Ciclev10000289m	0.286341	0.322936	0.749096	0.546863	1.64175	0.737055
Ciclev10000290m	12.0801	10.8668	11.8981	8.82332	10.1007	8.27757
Ciclev10000294m	6.15504	6.24751	5.92332	4.15628	5.29355	5.45717
Ciclev10000295m	90.7059	109.7	106.599	98.1437	69.8481	56.1106
Ciclev10000296m	7.19627	8.84542	14.2666	12.7945	8.88772	13.4531
Ciclev10000297m	0.72771	0.324678	0.43933	0.320724	0.557442	0.240149
Ciclev10000298m	1.79834	0.842879	0.794291	2.67627	3.05874	6.03176
Ciclev10000301m	1.9115	4.12207	1.64857	1.84538	2.57353	2.27091
Ciclev10000302m	0.666301	0.792745	0.689582	0.713173	0.696002	0.747604
Ciclev10000306m	35.0062	39.0179	61.929	44.6621	45.1555	50.6754
Ciclev10000307m	3.30584	7.19036	8.23053	8.71438	9.90256	10.4699
Ciclev10000309m	7.10511	8.44925	8.15582	6.09247	7.0959	4.01582
Ciclev10000310m	5.14451	4.02372	2.77911	4.74671	3.42948	1.24397
Ciclev10000311m	27.5851	40.7118	128.847	53.2145	41.4148	128.551
Ciclev10000312m	7.39418	3.18905	5.03792	9.12477	3.34697	8.58925
Ciclev10000313m	5.45404	13.7735	15.7852	11.4545	12.4395	21.657
Ciclev10000315m	10.5177	17.627	11.0873	12.9599	12.1608	7.45489
Ciclev10000316m	5.50057	10.0567	11.5746	5.25259	10.8614	11.3544
Ciclev10000322m	0.985142	1.17907	1.42011	1.80467	1.27407	0.764767
Ciclev10000323m	1.95565	1.8905	1.2253	2.68352	1.19765	0.296113
Ciclev10000324m	93.1673	75.3188	65.4788	69.7715	65.145	69.6028
Ciclev10000325m	10.0115	9.77019	6.25381	12.4477	8.93395	7.69014
Ciclev10000326m	0	0.332646	1.92905	0.516365	0.519203	1.91913
Ciclev10000327m	0.660409	0.589301	0.284785	1.03951	0.275939	0.130763
Ciclev10000328m	6.62986	6.0028	7.85208	10.8531	6.72055	10.0551
Ciclev10000329m	7.36478	9.05635	4.7358	1.24107	1.32366	1.39392
Ciclev10000330m	5.08118	6.53235	5.34457	3.60157	7.16081	4.94404
Ciclev10000331m	2.18523	3.48798	1.76632	0.540744	0.460068	0.654058
Ciclev10000333m	3.03796	3.7199	11.5241	9.78054	4.35459	26.8048
Ciclev10000334m	10.3415	10.3969	9.2758	13.7464	12.6576	11.7481
Ciclev10000335m	12.6438	10.5183	16.8306	12.5754	12.8601	15.0843
Ciclev10000336m	4.16085	4.96573	9.50295	8.57721	10.5564	11.8562
Ciclev10000337m	0.523568	2.19322	6.71809	3.61879	9.00573	11.3805
Ciclev10000338m	0.232992	0.619384	0.587761	1.76401	3.05845	1.64927
Ciclev10000339m	0.266267	0	0	0.0435879	0.241051	0
Ciclev10000341m	10.5646	10.6812	10.1605	7.57617	11.4945	5.90447
Ciclev10000342m	5.99221	5.99408	6.4847	8.31655	10.0947	12.7865
Ciclev10000343m	6.02065	6.45061	6.63777	8.29532	7.58527	6.32813
Ciclev10000344m	10.2729	7.40445	9.09302	6.30628	7.38293	5.68291
Ciclev10000345m	0.0459423	0.0444119	0	0.225623	0.207958	0
Ciclev10000346m	2.5233	3.26858	3.56465	2.85014	2.92395	3.68055
Ciclev10000347m	1.70657	2.518	1.81268	2.35256	2.96795	1.6184
Ciclev10000348m	10.9815	9.90459	15.6702	8.47229	9.2756	9.28706
Ciclev10000349m	0	0	0	0.143513	0	0
Ciclev10000351m	0.0462196	0.714879	0.207283	0.264815	0.376583	0.317257
Ciclev10000352m	18.5396	12.7532	3.13757	25.6866	9.09318	5.40249
Ciclev10000353m	0.105975	0.409778	1.24758	6.41878	3.26192	21.8682
Ciclev10000354m	0	0	0	0.291224	0.48316	0.814089
Ciclev10000355m	1.84726	0.0541129	0.0627614	0.82472	0.0506765	0.144089
Ciclev10000356m	0	0	0	0	0	0
Ciclev10000358m	16.5713	12.1289	19.2165	32.3589	17.4451	8.49043
Ciclev10000359m	2.28856	2.31065	1.53954	4.37077	2.44016	1.91999
Ciclev10000360m	0.168138	0.162537	0	0	0	0
Ciclev10000361m	10.1805	8.19444	8.38596	13.9446	9.55496	9.05591
Ciclev10000363m	61.1458	189.443	223.468	236.923	233.346	157.224
Ciclev10000364m	9.39343	4.56507	0.517957	5.96597	1.99818	4.36018
Ciclev10000365m	2.81599	3.41607	4.33348	3.93187	4.54877	10.6122
Ciclev10000367m	16.3013	16.6171	22.1613	17.5963	18.4571	21.9521
Ciclev10000370m	16.0233	19.3838	24.7147	16.857	12.3751	18.3699
Ciclev10000372m	2.16187	3.18702	2.24206	3.22932	2.20178	2.31865
Ciclev10000375m	1.15952	0.640513	1.23814	0.632715	1.19968	2.79517
Ciclev10000376m	0.0566446	0.219031	0.952637	0.370909	0.512803	0.437418
Ciclev10000378m	6.52716	8.1199	19.0752	9.67779	14.5304	99.2467
Ciclev10000379m	11.439	10.2605	13.9351	0.135041	0.34851	0.566242
Ciclev10000382m	0.593215	0.0955756	0.110851	1.13294	0.805555	0.551404
Ciclev10000383m	21.0298	22.1729	22.7905	22.882	29.0344	18.776
Ciclev10000386m	1.95433	2.15911	1.4086	1.82813	1.97987	1.1179
Ciclev10000387m	43.3126	40.4848	40.8386	63.6412	28.0862	29.1724
Ciclev10000389m	0.80241	0.365026	0.0529207	1.08174	0.256384	0
Ciclev10000392m	5.64903	26.2387	12.8732	4.66133	13.8454	18.9544
Ciclev10000393m	10.714	4.23035	8.62858	8.93406	3.00543	4.92006
Ciclev10000394m	24.0836	23.3347	22.3573	21.7922	21.7528	18.484
Ciclev10000395m	4.33138	4.02396	5.61311	4.28191	4.37952	4.6817
Ciclev10000396m	4.51897	4.19713	7.30188	8.66676	7.74086	9.00915
Ciclev10000397m	0	0	0	0	0	0
Ciclev10000400m	6.5452	4.96159	11.1924	3.96976	6.52216	7.39358
Ciclev10000404m	4.82636	6.42814	7.75612	4.25763	5.19461	7.546
Ciclev10000405m	29.139	27.9553	22.2948	36.1135	30.1195	25.4271
Ciclev10000407m	1.97955	0.724068	0.23994	2.14575	0.678086	0.27543
Ciclev10000408m	3.30382	2.57408	2.37732	3.18851	2.85703	1.39621
Ciclev10000409m	12.6202	16.4192	16.7561	10.019	11.7686	12.6602
Ciclev10000411m	0.377734	0.182576	0.28234	0.103059	0	0.378119
Ciclev10000412m	0.0625842	0	0	0.0512252	0.0566574	0
Ciclev10000415m	8.6262	95.1665	322.55	0.0398901	0	0.125448
Ciclev10000416m	16.9576	22.1964	15.7061	18.061	33.0396	14.4144
Ciclev10000417m	0	0.122219	0.0708763	0	0	0.37968
Ciclev10000418m	0.921072	1.66948	1.16178	12.4864	4.065	0.691508
Ciclev10000419m	5.47985	7.15136	6.26681	5.29261	7.63979	5.59514
Ciclev10000420m	1.58475	0.183835	0	0.88204	0.17216	0
Ciclev10000421m	0.245108	0.710828	1.03054	1.4545	0	0.630919
Ciclev10000422m	6.2554	13.1265	24.0054	9.53245	9.57646	16.6253
Ciclev10000424m	2.28252	2.41865	3.69105	2.98201	1.82794	4.10519
Ciclev10000425m	65.2308	133.069	172.911	54.7296	92.6995	110.021
Ciclev10000426m	1.55698	0.415203	0.842733	2.59272	0.486045	1.65837
Ciclev10000427m	1.84296	3.94833	2.79229	1.63077	5.41111	1.7095
Ciclev10000428m	11.5444	12.2758	8.3824	11.7889	6.61905	10.1883
Ciclev10000430m	2.37439	2.37181	2.5734	2.17018	3.79751	1.39213
Ciclev10000431m	0.168618	0.217334	0	0.414041	0	0
Ciclev10000432m	11.4696	14.2472	17.7902	9.77702	16.409	18.0505
Ciclev10000433m	27.2414	33.4858	62.2939	42.8298	39.5207	67.7246
Ciclev10000434m	15.2428	16.7815	20.7691	21.0536	21.9926	15.7578
Ciclev10000437m	41.6685	15.4027	23.958	67.8312	13.8778	75.0917
Ciclev10000438m	3.03418	1.87719	0.748413	2.08612	0.878988	0.364472
Ciclev10000439m	8.55703	6.62603	11.7967	9.43388	10.1181	11.5001
Ciclev10000440m	1.11231	1.28006	1.06894	1.08384	1.00697	0.863484
Ciclev10000444m	5.71427	4.02872	7.46653	5.6618	4.66748	3.98134
Ciclev10000445m	1.49509	2.57637	1.67627	2.50067	3.29548	2.3983
Ciclev10000447m	2.6629	2.52166	2.31537	4.40365	3.49309	2.65784
Ciclev10000448m	10.8059	12.7743	11.3126	8.52496	17.7972	7.87532
Ciclev10000450m	1.1374	1.09951	5.54452	2.71194	4.74553	12.6868
Ciclev10000451m	1.68949	1.23728	0.688814	1.04762	1.06601	1.18605
Ciclev10000454m	40.7576	21.2199	17.698	50.3178	51.6905	29.3098
Ciclev10000456m	14.8198	14.9916	16.525	16.2728	13.1964	14.4528
Ciclev10000457m	1.61013	2.44592	1.65052	1.35555	2.832	2.40779
Ciclev10000458m	2.1103	1.47334	2.36604	1.48738	2.17579	2.36393
Ciclev10000459m	27.4658	13.5646	12.6836	15.4472	15.2635	13.0664
Ciclev10000461m	5.591	11.311	6.46243	10.2847	9.54907	3.06624
Ciclev10000462m	3.37924	3.80122	2.41103	2.91678	5.84034	4.37553
Ciclev10000463m	112.449	107.003	102.416	101.416	113.945	90.8786
Ciclev10000464m	1.90806	4.87901	4.62364	6.34777	5.23783	0.686547
Ciclev10000465m	20.3551	14.3816	17.3912	16.4247	12.372	8.21303
Ciclev10000466m	1.57344	0.522854	0.606417	3.62212	2.00311	0.464077
Ciclev10000467m	3.65361	3.87528	4.32395	4.44419	5.78832	4.17981
Ciclev10000468m	1.1784	0.797403	1.18909	1.49501	1.60021	0.657207
Ciclev10000469m	43.7108	36.6274	43.34	43.3842	45.2112	28.1723
Ciclev10000471m	3.72748	4.15441	3.8842	2.83559	3.37449	4.36466
Ciclev10000476m	16.0544	12.4786	11.0676	17.4468	13.5029	12.9373
Ciclev10000478m	5.63481	4.75173	6.31767	6.23124	8.52007	6.5835
Ciclev10000479m	1.42458	0.90374	0.14974	3.57095	0.806047	0.114592
Ciclev10000480m	24.4449	25.6037	30.513	42.8803	25.1216	21.3077
Ciclev10000481m	2.42575	2.23588	1.26499	2.124	3.31958	1.16168
Ciclev10000482m	1.50475	2.00011	0.210889	2.30933	0.908168	0.591756
Ciclev10000483m	0.975516	1.19449	1.02082	1.59692	1.11864	1.28341
Ciclev10000484m	2.82777	2.54887	3.38468	2.31453	3.35565	3.24596
Ciclev10000487m	0	0	0.0681275	0.198941	0	0
Ciclev10000488m	0	0.0548478	0.0636137	0.18576	0.102729	0
Ciclev10000490m	33.7789	31.9872	33.1161	29.9484	28.5637	28.1184
Ciclev10000491m	51.2856	43.226	45.242	38.6063	41.7238	41.7743
Ciclev10000494m	8.11924	7.30234	6.8562	5.46791	7.44339	2.82185
Ciclev10000495m	0.701346	0.0564986	0.851868	0.526215	0.476196	0.752209
Ciclev10000500m	5.95712	6.25703	8.60569	7.97024	5.85968	6.88061
Ciclev10000502m	0.754356	0.504849	0.260238	1.51985	2.46901	1.54344
Ciclev10000504m	14.2609	13.3176	22.7467	10.7475	10.4744	16.6226
Ciclev10000505m	5.82168	7.30525	8.84935	4.44432	7.29742	5.90766
Ciclev10000508m	18.0471	19.1747	32.326	18.542	19.0855	19.4837
Ciclev10000510m	223.702	508.181	770.778	131.817	249.532	382.682
Ciclev10000511m	8.40766	13.7497	9.78093	18.4719	12.0753	3.09168
Ciclev10000513m	14.7473	11.0694	7.19737	27.9756	14.8167	5.45835
Ciclev10000514m	4.34893	1.98841	4.81007	2.06842	4.52233	1.86573
Ciclev10000515m	63.0004	71.0792	74.7792	84.8431	62.2561	65.9236
Ciclev10000518m	17.495	5.63741	1.1012	17.9373	5.22384	1.26409
Ciclev10000521m	4.89962	3.08417	0.383259	8.34711	4.4872	0.635482
Ciclev10000524m	8.29905	7.35405	5.15086	6.99495	5.27708	3.94183
Ciclev10000525m	2.33059	3.5573	3.16314	1.2048	2.66512	3.47314
Ciclev10000527m	1.67119	3.50029	3.35707	1.88082	1.07166	1.67289
Ciclev10000528m	3.09479	3.6399	5.72523	6.62825	5.97699	4.82395
Ciclev10000531m	0	0.370738	1.4333	0	0	0.383904
Ciclev10000532m	21.0092	7.22545	3.28414	17.9401	10.4699	2.29661
Ciclev10000533m	4.08197	3.41593	1.36616	2.29389	1.65466	0.888668
Ciclev10000534m	118.456	90.7416	96.7421	90.7966	122.06	91.3847
Ciclev10000536m	0.333187	0.257671	0.149426	1.58174	0.301634	0.400233
Ciclev10000537m	128.191	134.882	152.085	92.8474	101.99	123.895
Ciclev10000538m	0.456749	0	0.146315	0.213628	0.118141	0.111971
Ciclev10000539m	14.516	17.5545	13.0979	21.6799	15.0261	16.7224
Ciclev10000541m	1.57228	1.83437	0.972592	2.70696	3.0431	2.09335
Ciclev10000542m	0	0.132026	0.22969	0.223574	0	2.10931
Ciclev10000543m	0	0	0	0.436554	0.30178	0.228815
Ciclev10000544m	0	0	0	0	0	0
Ciclev10000547m	8.98231	10.0431	8.73615	11.6481	9.1114	2.92493
Ciclev10000549m	2.05623	2.80322	5.02463	2.45981	4.58217	3.2119
Ciclev10000550m	8.28896	8.92096	6.62934	7.68912	11.9063	7.30172
Ciclev10000551m	26.9428	25.0275	28.333	22.7118	19.5691	27.422
Ciclev10000552m	0	0.104821	0	0.0443764	0	0
Ciclev10000554m	2.43612	1.45784	1.56077	1.42426	1.5753	0.348372
Ciclev10000557m	22.6555	1.08899	0.280674	26.381	5.38246	0.590681
Ciclev10000558m	3.48435	1.03639	1.02173	1.49179	0.582347	0.781903
Ciclev10000559m	17.0659	11.7538	13.3889	17.0962	13.8379	11.8111
Ciclev10000562m	1.53192	1.00489	0.429392	3.00036	1.43638	0.704151
Ciclev10000564m	20.8173	22.567	15.3985	32.0638	23.6326	10.4716
Ciclev10000565m	14.9495	13.0111	15.369	18.2526	11.3756	12.2729
Ciclev10000566m	5.57422	5.15923	0.465406	8.44549	4.1337	1.47554
Ciclev10000567m	12.3409	11.7374	12.7206	8.14599	14.8362	11.101
Ciclev10000570m	3.66279	5.6786	6.4312	4.69498	5.25542	7.17493
Ciclev10000571m	7.21728	10.1884	6.10105	9.70494	8.81544	11.4022
Ciclev10000572m	6.966	6.50623	6.52735	9.33753	13.9226	15.0146
Ciclev10000573m	7.54684	11.2702	9.97863	6.90131	8.764	10.1819
Ciclev10000574m	0	0	0	0	0	0
Ciclev10000575m	3.01636	3.52336	2.46597	2.82894	3.24272	2.37242
Ciclev10000576m	7.69073	6.00672	34.0341	22.7616	12.4955	28.9298
Ciclev10000577m	0	0	0	0	0	0
Ciclev10000579m	0	0	0	0	0	0
Ciclev10000580m	0.364743	0.0705186	0	0	0	0
Ciclev10000581m	0.729487	1.19882	0.081789	1.67184	3.03786	1.56478
Ciclev10000582m	3.45636	4.31756	3.74941	4.11496	4.7342	3.00413
Ciclev10000583m	9.68976	7.72278	16.4694	13.12	11.1518	13.7534
Ciclev10000585m	18.666	22.0148	21.6444	22.4129	28.9627	19.6966
Ciclev10000586m	0	0.0643555	0.0746409	0.0544902	0.0602686	0.0571209
Ciclev10000587m	37.85	41.6815	43.0203	46.5769	38.2103	39.0604
Ciclev10000591m	4.99818	5.61219	3.49166	9.75551	8.56241	2.21024
Ciclev10000592m	5.59403	9.0128	14.3178	9.98993	6.80351	22.6898
Ciclev10000593m	82.4671	77.6704	80.7626	105.496	100.974	105.563
Ciclev10000595m	37.3565	19.9464	24.1423	27.1177	20.5518	26.8454
Ciclev10000596m	5.64901	4.74072	10.1616	9.95877	7.41817	18.216
Ciclev10000597m	9.81341	7.7143	2.2368	6.75241	6.24814	2.12815
Ciclev10000599m	6.67038	1.22569	0.618078	12.5438	0.898318	0
Ciclev10000600m	105.199	131.448	74.0393	115.528	97.4721	71.885
Ciclev10000601m	14.485	8.73547	8.86514	13.2156	10.0455	8.15254
Ciclev10000602m	1.76935	1.18413	0.152598	4.40034	0.554465	0.233558
Ciclev10000603m	33.8646	33.9321	34.4688	29.2126	37.4289	56.0914
Ciclev10000604m	0.0713998	0.276085	0.960629	0.116882	1.93915	1.83787
Ciclev10000605m	13.8722	8.8671	10.2208	24.7944	14.7114	10.4451
Ciclev10000608m	205.218	248.154	372.504	301.017	395.086	274.192
Ciclev10000610m	0.282961	0.136768	0	6.42702	1.28082	0.0606964
Ciclev10000611m	10.2837	8.26499	9.65295	8.36826	7.57775	6.05338
Ciclev10000612m	60.5313	62.8848	64.7784	63.362	67.076	68.6634
Ciclev10000613m	0.30449	1.17739	2.7994	1.39566	2.59115	6.06117
Ciclev10000614m	5.83208	4.18084	10.2124	8.84986	5.39842	15.0121
Ciclev10000617m	231.725	224.183	328.351	114.385	182.316	123.755
Ciclev10000618m	3.05205	4.55385	8.10845	12.4905	7.98872	3.70035
Ciclev10000620m	3.9133	2.02853	5.27776	2.13536	1.54031	4.13627
Ciclev10000621m	9.33327	10.2068	7.39372	7.37384	8.67777	9.09028
Ciclev10000622m	29.6231	28.0434	29.6372	25.0999	26.318	22.7859
Ciclev10000623m	0.149699	0.144712	0	0.122529	0.54209	0.385333
Ciclev10000624m	0.305299	0.236103	0.136919	0.19991	0.497496	0.0523903
Ciclev10000625m	41.3814	44.5679	81.2753	82.5648	94.4056	116.083
Ciclev10000627m	1.98141	18.7816	32.2121	4.86535	6.87611	7.46147
Ciclev10000628m	0	0	0	0	0	0.0646434
Ciclev10000629m	0.0643665	0.373334	0.866002	0.105368	0.174813	1.71205
Ciclev10000630m	0.591412	1.50074	1.40905	2.0573	1.00388	2.0932
Ciclev10000631m	1.41566	1.9635	1.17316	2.97237	2.95324	1.42591
Ciclev10000632m	20.0276	13.3398	12.665	14.5934	10.6133	8.22528
Ciclev10000635m	5.39627	5.32015	6.57111	8.01469	8.96167	6.25522
Ciclev10000637m	19.648	16.66	12.5251	44.3861	33.2369	20.3263
Ciclev10000638m	4.22756	4.35039	2.36994	0.167432	0.0617291	0.23402
Ciclev10000639m	0.224915	0.0724743	0	0.613644	0.135744	0
Ciclev10000643m	71.8288	74.7847	112.341	109.308	65.9373	79.1958
Ciclev10000645m	0.306158	0.83855	1.08699	0.417651	0.692911	2.23285
Ciclev10000648m	27.3387	32.6259	11.9616	34.5517	19.874	10.0782
Ciclev10000649m	2.37614	2.57044	2.60067	2.50056	2.15112	2.62128
Ciclev10000650m	4.98424	4.46393	4.02684	6.35939	6.30385	6.0375
Ciclev10000651m	0	0.53742	0.311656	0.720475	0.712996	1.19251
Ciclev10000652m	2.37928	3.81319	4.56303	4.30487	6.85866	4.24409
Ciclev10000653m	0	0	0	0	0	0
Ciclev10000654m	2.34294	3.31023	6.66821	19.9146	9.57197	5.46384
Ciclev10000656m	36.8019	47.0889	74.7043	81.1021	96.8905	76.5941
Ciclev10000657m	19.7028	26.7546	32.1221	19.428	24.3002	24.5823
Ciclev10000658m	0	0	0	0	0	0
Ciclev10000659m	7.79252	7.07039	10.9594	13.3159	12.9953	15.0144
Ciclev10000662m	11.9563	11.4259	11.72	12.079	11.0714	7.67936
Ciclev10000664m	0	0	0.435931	0	0	0.0667216
Ciclev10000670m	21.9893	31.1412	30.5095	22.7228	30.2585	29.3857
Ciclev10000671m	40.3558	34.8431	49.9569	47.1487	52.8993	87.7032
Ciclev10000672m	31.6146	31.3702	17.2874	27.5886	40.7939	17.4344
Ciclev10000673m	12.135	5.86538	3.76583	175.459	95.7334	7.01882
Ciclev10000678m	1.49321	1.74419	1.53465	1.78237	1.74608	0.960899
Ciclev10000680m	2.43953	0	0	0	0	0
Ciclev10000682m	375.027	286.255	438.486	321.519	642.414	896.842
Ciclev10000685m	29.2218	30.6073	37.4825	15.0299	21.263	22.4556
Ciclev10000688m	3.47446	0	0	2.84385	0.285948	0.135507
Ciclev10000689m	0.266293	0.128711	0.0746409	0.0544902	0	0
Ciclev10000690m	29.7124	21.4036	19.1889	8.43635	17.2796	8.07937
Ciclev10000691m	5.52793	2.70332	2.7708	4.25846	5.94644	3.40384
Ciclev10000692m	7.68224	3.20683	0.326258	7.90754	2.95049	0.249678
Ciclev10000693m	11.2202	12.0957	30.824	13.3188	20.3152	31.4519
Ciclev10000694m	15.5134	13.8702	11.9223	14.9631	11.275	12.061
Ciclev10000698m	16.5728	26.4055	18.3391	9.76494	13.9771	8.56891
Ciclev10000699m	19.6139	12.9438	19.2347	15.5403	17.6144	17.2779
Ciclev10000702m	55.0306	36.5765	22.0571	112.408	43.7687	21.0419
Ciclev10000704m	11.8211	9.87686	12.1214	6.85555	5.80791	8.20589
Ciclev10000705m	3.87325	0.0720044	0	3.35316	0.134864	3.06768
Ciclev10000706m	22.188	9.56682	10.2852	16.2376	11.1275	5.2344
Ciclev10000707m	20.2353	22.8319	29.253	21.6219	21.3819	41.926
Ciclev10000708m	3.44975	2.88265	3.86781	2.58433	3.38772	3.06028
Ciclev10000709m	43.8026	72.4473	36.1233	74.7477	144.863	83.349
Ciclev10000710m	4.98882	7.52624	6.86463	4.26897	4.58481	2.72395
Ciclev10000711m	4.10527	6.33931	4.7821	3.79655	4.92315	4.62027
Ciclev10000713m	100.1	78.9639	52.6741	72.9462	94.948	60.3134
Ciclev10000715m	0	0	0	0	0	0.20361
Ciclev10000716m	1.44673	0.83912	1.05433	1.06573	0.916804	0.806855
Ciclev10000719m	15.71	15.4134	19.6513	12.6667	15.0183	14.586
Ciclev10000720m	1.56009	2.63921	1.23898	1.38335	1.53004	1.84055
Ciclev10000721m	3.15827	2.05388	5.08618	7.42614	6.91402	9.21349
Ciclev10000722m	7.82381	7.17102	9.61666	9.48711	7.55509	12.5309
Ciclev10000723m	0	0	0	0.702745	0.259089	0
Ciclev10000724m	5.6025	8.52844	8.80846	7.01025	8.45323	10.7744
Ciclev10000725m	10.5084	6.87939	7.15861	8.65558	6.38231	7.58975
Ciclev10000727m	11.0036	20.2611	12.4106	11.2581	12.0369	14.5553
Ciclev10000728m	9.19153	9.48661	13.7147	12.1617	9.50981	11.9187
Ciclev10000732m	0.32652	0.0789107	0	0	0.0738995	0
Ciclev10000733m	0.135769	0.0656229	0.913331	2.7226	0.491645	1.45615
Ciclev10000734m	1.167	1.55789	2.55455	0.864222	1.1571	1.76421
Ciclev10000735m	0.288437	0.278829	0.0808479	0.413151	0.326403	0.309355
Ciclev10000736m	0	0	0	0	0	0
Ciclev10000737m	6.98819	2.06636	1.75137	6.46006	2.90271	1.48136
Ciclev10000738m	3.10059	2.86409	0.927024	3.44018	1.6218	0.945906
Ciclev10000739m	13.8592	14.5351	9.74837	19.3165	10.5345	9.08685
Ciclev10000740m	29.1667	25.0554	9.63902	16.3149	14.9318	10.3818
Ciclev10000741m	0.76724	0.519177	0	0.753584	0.0694582	0.0658305
Ciclev10000742m	5.60766	5.21237	4.71542	4.01614	6.05288	3.51607
Ciclev10000745m	0	0	0	0	0	0
Ciclev10000747m	187.885	173.464	64.2158	194.574	140.853	22.8995
Ciclev10000748m	0.910873	1.60096	0.371366	1.01666	2.09901	2.91303
Ciclev10000749m	4.05325	4.82244	6.57198	5.15503	4.51619	7.11603
Ciclev10000750m	3.06937	1.36328	2.51125	2.51229	2.5534	1.49473
Ciclev10000751m	1.99197	9.90317	26.5612	34.7049	38.2564	7.32491
Ciclev10000753m	0.325748	0.314897	0.456531	0.266625	0.516075	0.558995
Ciclev10000754m	33.3968	15.7904	0.0906635	63.4073	36.9691	0.208148
Ciclev10000755m	2.8345	4.91809	3.66693	2.37953	2.17129	4.92646
Ciclev10000756m	20.4689	12.202	5.9013	23.5352	18.3099	16.6009
Ciclev10000757m	3.65316	2.81209	2.04794	2.76863	2.2048	2.20574
Ciclev10000758m	11.6189	13.3215	15.602	21.84	24.156	13.7366
Ciclev10000759m	1.7676	1.56014	2.06798	2.64195	2.4351	1.78039
Ciclev10000760m	2.40139	0.960578	0.0928416	3.5922	0.224894	0.213148
Ciclev10000761m	154.697	183.725	418.345	167.173	267.251	408.964
Ciclev10000762m	3.22902	4.41715	3.55202	1.29654	0.827329	1.20231
Ciclev10000763m	0.128793	0.43576	1.08301	0.316252	0.349789	0.773546
Ciclev10000764m	33.5312	36.2315	18.1595	25.1445	20.6613	11.9446
Ciclev10000765m	56.4872	47.5197	74.486	77.7088	47.1353	74.4225
Ciclev10000767m	22.3023	27.2839	21.1498	32.9127	27.4103	19.7504
Ciclev10000768m	0.725647	0.155883	0.361594	0.0659937	0	0
Ciclev10000769m	13.2207	7.82467	11.6465	20.2621	18.0752	13.6007
Ciclev10000770m	55.0676	20.9647	1.44825	29.7704	11.3861	0.349992
Ciclev10000771m	0	0	0	0	0	0
Ciclev10000772m	10.8204	11.6747	15.7321	10.2278	12.3236	12.818
Ciclev10000775m	32.5024	20.1441	35.0453	28.695	32.9838	35.7029
Ciclev10000776m	15.6799	8.94061	9.4081	13.0346	9.86997	10.3004
Ciclev10000779m	12.1464	9.99178	11.5887	10.1808	9.93878	10.522
Ciclev10000781m	61.6594	44.4851	33.7871	20.7113	24.9851	18.084
Ciclev10000782m	3.19426	3.87776	5.08053	2.31049	2.21926	3.12315
Ciclev10000783m	5.19699	1.65492	0	10.7094	0.774913	0.05246
Ciclev10000784m	34.3369	38.3339	67.6477	31.4903	45.766	54.8111
Ciclev10000788m	2.02754	1.0163	15.4076	10.5719	9.4496	1.09535
Ciclev10000789m	8.88728	13.5447	9.15638	15.9247	16.6712	12.0221
Ciclev10000790m	13.37	16.9584	27.0207	12.5465	10.7162	18.7785
Ciclev10000792m	2.59138	2.90358	2.37716	2.79592	3.19905	1.76865
Ciclev10000793m	13.3478	9.8085	7.54352	10.4367	12.182	8.10064
Ciclev10000794m	2.0764	0	0	0.543851	0	0
Ciclev10000795m	5.45761	5.5396	5.35413	1.56347	3.5203	2.51696
Ciclev10000797m	19.0987	20.3491	12.8166	19.3407	14.4504	12.679
Ciclev10000798m	35.6367	30.7473	27.0008	26.9903	31.4979	24.339
Ciclev10000799m	7.0805	9.25293	7.49752	2.46841	5.22294	6.58145
Ciclev10000800m	3.98105	3.39567	3.01942	4.02519	3.28603	3.01394
Ciclev10000803m	85.884	92.3677	107.408	62.7898	75.1142	69.0112
Ciclev10000804m	81.8717	49.5996	29.421	61.7562	65.5663	28.2367
Ciclev10000806m	0	0	0	0	0.0771901	0
Ciclev10000807m	1.76847	1.44655	1.90653	2.56096	3.01727	2.50951
Ciclev10000808m	17.4452	5.44001	1.26189	21.8213	2.86568	1.26747
Ciclev10000809m	4.34459	3.74051	6.31721	36.8385	17.6992	2.97054
Ciclev10000810m	0	0	0	0.0620733	0.0686558	0
Ciclev10000811m	0	0	0.0850282	0	0.0686558	0
Ciclev10000812m	64.0721	62.216	33.0462	66.7671	61.8088	35.6621
Ciclev10000813m	0	0	0	0	0	0
Ciclev10000814m	0	0	0.679478	0	0.0685804	4.87489
Ciclev10000815m	17.1782	6.60536	3.93792	5.74961	4.04685	5.91761
Ciclev10000816m	1.38954	0.74625	0	0.126371	0.069886	0
Ciclev10000817m	0.0698445	0.135036	0	1.20052	0.12646	0
Ciclev10000819m	0.0691093	0	0	0.509094	0.0625646	0.0592969
Ciclev10000821m	4.86831	2.71508	1.60949	11.2389	6.49791	2.51696
Ciclev10000822m	1.43543	0.693806	1.52891	6.28572	2.98883	10.6535
Ciclev10000825m	49.4347	95.3254	86.2255	62.4701	65.6928	88.3339
Ciclev10000826m	5.60109	8.33001	9.52331	7.80876	5.46071	13.8366
Ciclev10000827m	4.49373	6.23275	13.7276	6.39674	4.83464	28.2193
Ciclev10000828m	32.1333	19.4009	2.9919	13.2416	11.1227	5.62866
Ciclev10000831m	87.0711	73.3919	68.4063	89.6231	85.4603	65.7327
Ciclev10000834m	5.96125	5.17163	4.37009	3.50308	3.0443	4.78698
Ciclev10000835m	55.7918	22.0957	8.26944	63.1788	14.8087	4.32337
Ciclev10000836m	4.51333	4.72158	7.20917	6.57865	7.4442	8.11636
Ciclev10000838m	34.7256	29.721	33.0861	40.3314	45.4781	36.3312
Ciclev10000839m	5.23323	3.55997	2.10068	5.02374	3.45087	3.0489
Ciclev10000841m	22.7668	12.1046	1.05106	16.7712	3.57657	0.91926
Ciclev10000842m	7.31918	9.09102	17.7482	11.7725	8.74485	8.2516
Ciclev10000843m	36.9809	28.0885	46.88	57.4265	27.4713	64.7319
Ciclev10000844m	0.087372	0.0844615	0	0	0	0
Ciclev10000845m	2.59526	0.3136	4.09186	0.265527	0.146843	1.87884
Ciclev10000846m	0.0739265	0.0714639	5.63621	0.0605089	0.870033	6.78703
Ciclev10000847m	12.2598	11.8903	8.42761	11.0546	9.42491	7.44963
Ciclev10000848m	0.373437	0.938593	0.167477	54.6518	8.45181	0
Ciclev10000849m	4.43729	8.57895	0.497503	10.0656	2.98411	0.271948
Ciclev10000850m	71.3399	105.769	128.49	81.5612	90.7629	120.72
Ciclev10000851m	0.0839665	0.0811694	0.47071	0.137453	0.15203	0
Ciclev10000852m	35.9729	50.1323	68.1099	29.5012	30.919	69.9576
Ciclev10000853m	30.6156	33.0387	31.0238	31.3937	34.1648	44.3688
Ciclev10000854m	5.27685	5.75353	4.9532	5.72533	5.38815	5.00144
Ciclev10000855m	0	0.0816168	0	0.138211	0	0.0724417
Ciclev10000856m	2.10865	1.568	1.45488	2.38975	1.17474	2.0876
Ciclev10000858m	6.42598	3.244	3.44226	5.37655	3.81365	4.47214
Ciclev10000859m	0.23964	0	0.358242	0.0653819	0	0.274154
Ciclev10000860m	0	0.368993	0.0855932	0	0.276448	0.0655024
Ciclev10000861m	2.26567	4.12273	5.60348	3.16349	7.23923	3.31621
Ciclev10000862m	0	0	0	0	0	0
Ciclev10000863m	11.9736	15.5749	15.3989	17.7273	20.723	15.7881
Ciclev10000865m	21.3884	14.0596	7.67372	20.6307	12.3923	7.11478
Ciclev10000866m	22.0597	15.4366	1.38431	38.0655	12.5189	1.48313
Ciclev10000867m	1.96028	1.57915	1.61175	1.49752	2.07041	1.06524
Ciclev10000869m	4.66032	3.27642	5.83582	3.46771	6.1915	6.28357
Ciclev10000871m	34.4026	31.9872	36.069	25.4179	36.8505	27.2647
Ciclev10000874m	5.48161	4.02457	4.43439	3.06686	6.65855	3.57214
Ciclev10000875m	4.33609	9.44897	10.3823	4.93264	5.72186	5.61219
Ciclev10000876m	12.5978	14.4439	25.4241	27.8646	22.6505	19.2554
Ciclev10000877m	5.25076	6.33172	5.40154	6.51309	7.44879	6.22373
Ciclev10000878m	29.524	16.9819	23.508	49.3512	23.7526	19.4488
Ciclev10000880m	3.20635	4.9895	5.34853	4.09662	3.75228	4.2944
Ciclev10000881m	30.093	17.7948	11.6056	17.1632	14.5394	15.4281
Ciclev10000884m	0	0	0	0.447814	0	0.0586792
Ciclev10000885m	0.0669286	0.194097	0.375197	0.109562	0.242362	0.0574259
Ciclev10000886m	0	0.142241	0	0.180655	0	0.0631256
Ciclev10000887m	6.85212	11.5081	14.4338	6.28828	11.4666	12.2929
Ciclev10000889m	18.0043	19.6478	23.5057	8.51445	8.54807	21.1466
Ciclev10000890m	9.03864	6.71617	7.0333	6.18352	5.1905	6.13479
Ciclev10000891m	26.3098	32.2964	28.1604	59.1347	32.8379	60.6075
Ciclev10000893m	16.84	19.457	12.2612	9.82968	7.65297	10.3618
Ciclev10000894m	3.38296	4.07115	3.87034	6.27254	3.1876	4.02815
Ciclev10000895m	4.55527	3.96318	3.06439	13.0497	3.57404	2.3451
Ciclev10000897m	3.39105	2.7605	1.80095	3.21383	1.69653	0.612543
Ciclev10000901m	26.8532	23.5856	36.8479	22.1434	29.1178	31.4657
Ciclev10000902m	4.09524	2.01414	0.724977	3.17554	1.82119	0.739744
Ciclev10000905m	1.90076	2.23118	1.67444	1.83359	0.798923	0.407721
Ciclev10000906m	40.1014	51.961	68.6865	29.0275	51.6175	57.2153
Ciclev10000909m	0	0.0555103	0	0.0470009	0.0519851	0
Ciclev10000910m	2.81594	3.14093	3.76435	2.74809	3.62781	2.41613
Ciclev10000913m	0.0890652	0.258295	0	0.2187	0.241892	0
Ciclev10000915m	1.71321	2.28706	1.64643	2.53744	1.3294	2.23995
Ciclev10000917m	8.80375	10.0302	25.1173	34.2279	19.4269	46.3342
Ciclev10000918m	6.20002	12.1368	53.7863	6.59714	13.3306	65.1001
Ciclev10000919m	17.1365	8.96255	17.578	15.561	14.4762	15.5525
Ciclev10000921m	248.233	269.773	222.947	238.223	183.866	142.898
Ciclev10000923m	1.2138	1.38043	2.16142	0.409086	0.193915	0.367573
Ciclev10000924m	0.0778504	0.075257	0.174569	0	0	0.133594
Ciclev10000925m	0	0	0	0.1458	0	0
Ciclev10000926m	6.72731	6.07443	3.06676	2.11781	0.334628	1.2686
Ciclev10000927m	1.12492	0.339827	0	0.230187	0.254597	0
Ciclev10000928m	0.71548	0.0691646	0	0.761307	0.129545	0
Ciclev10000930m	15.2501	12.7564	12.213	9.17059	10.6502	7.10318
Ciclev10000931m	24.5574	22.1044	36.1044	37.8194	50.2817	43.0119
Ciclev10000932m	8.38365	10.0936	9.14328	3.99245	4.55383	6.2778
Ciclev10000934m	0	0	0.103054	0.451397	0.249633	0.15773
Ciclev10000935m	9.632	11.5427	18.4748	15.6373	19.2413	25.2714
Ciclev10000938m	6.61233	7.17706	5.39766	7.12132	6.87881	4.82745
Ciclev10000939m	9.26626	10.908	20.6108	14.0679	8.8623	13.2083
Ciclev10000940m	0.325556	0.7081	0.0912522	1.06587	0.147363	0.139666
Ciclev10000941m	26.7274	32.4694	37.3911	17.3351	27.2749	25.6456
Ciclev10000944m	0.296756	0	0	0.291474	0.161192	0.509244
Ciclev10000945m	47.1919	58.7443	52.0969	42.4893	51.9904	49.275
Ciclev10000946m	0.930317	1.97852	0	0.533026	0.252665	0
Ciclev10000947m	16.9042	14.8242	11.5156	28.4896	21.7605	11.9338
Ciclev10000948m	55.5582	104.387	143.996	60.9649	72.117	130.541
Ciclev10000949m	17.0635	14.9775	21.5036	21.1732	22.4917	28.6959
Ciclev10000950m	4.92111	14.7472	33.1049	4.83352	11.7317	28.4308
Ciclev10000951m	41.311	28.8692	34.5098	31.8976	37.0764	58.7121
Ciclev10000952m	7.2856	6.06224	5.89373	8.30328	5.09284	8.38764
Ciclev10000954m	0	0	0	0	0	0
Ciclev10000955m	1.52197	2.07709	1.80679	1.3923	2.67464	1.68996
Ciclev10000958m	1.36768	1.67808	1.82832	0.516669	0.904811	1.80538
Ciclev10000960m	1.58475	2.52773	7.28486	0.453991	0.789069	1.35974
Ciclev10000961m	0.609159	0.588867	0.607094	0.387798	0.306373	0.348446
Ciclev10000962m	6.11886	8.21958	15.2354	14.7647	9.92775	12.8866
Ciclev10000963m	21.0785	6.01864	4.12105	15.6564	14.3967	5.47077
Ciclev10000964m	158.432	129.915	85.5021	63.4407	176.432	130.414
Ciclev10000965m	16.6505	11.3267	14.2235	11.8257	14.1166	9.82662
Ciclev10000967m	0.38801	2.93817	9.06316	1.6938	5.62025	6.93582
Ciclev10000968m	1.24734	0.964633	0.186467	1.08901	1.43034	0
Ciclev10000970m	48.6689	52.848	62.9388	55.7152	72.7894	63.5534
Ciclev10000975m	0.947581	0.824413	0.956173	1.08583	0.686275	0.487824
Ciclev10000976m	1.06192	2.82301	1.88514	3.54917	2.32328	5.16317
Ciclev10000978m	3.28103	5.73611	4.5396	3.8283	2.52793	3.53395
Ciclev10000979m	3.2694	3.00632	2.41394	2.21913	2.09351	3.69465
Ciclev10000980m	12.8464	20.9016	17.7505	14.8096	11.7118	0.54336
Ciclev10000981m	0.975352	0.471431	0.859219	1.82475	0.756845	1.2553
Ciclev10000982m	116.33	79.7476	57.1865	53.4685	50.9361	51.6464
Ciclev10000983m	0.083006	0.0802409	0	0.135881	0	0
Ciclev10000984m	19.7369	24.1366	23.8884	20.8259	21.2691	18.7709
Ciclev10000985m	8.32464	5.28657	7.4259	7.51002	8.47145	9.9059
Ciclev10000986m	1.32935	1.10149	0	2.64247	0.773655	0
Ciclev10000988m	1.5717	3.88277	2.74115	0.857625	0.948572	2.69709
Ciclev10000990m	30.7469	23.2945	22.7768	21.8208	20.9316	17.1165
Ciclev10000991m	0.231817	1.23252	0.519819	7.77943	1.67891	3.6797
Ciclev10000992m	9.55257	8.07098	2.69864	9.11166	7.42225	2.64604
Ciclev10000996m	0.191092	0.27709	0.21425	0.0782046	0.0864978	0
Ciclev10000997m	24.1237	13.4387	30.0728	33.8681	27.4655	28.2061
Ciclev10000998m	7.08325	1.10663	0.641749	9.31137	1.42499	0.613894
Ciclev10001000m	61.8331	47.7402	44.1444	52.4931	65.5929	32.7959
Ciclev10001001m	17.97	17.4462	18.4108	14.3914	14.445	19.0073
Ciclev10001002m	29.6837	28.2418	32.4927	28.5799	26.024	24.9329
Ciclev10001005m	3.91232	6.23328	7.96057	1.06741	1.57414	2.61087
Ciclev10001007m	4.97554	6.90101	12.0463	12.6896	5.09188	8.29071
Ciclev10001008m	1.12035	1.75992	3.92538	3.78265	4.05701	3.06408
Ciclev10001011m	16.9962	20.9975	27.885	14.5023	15.0896	26.4635
Ciclev10001013m	0	0	0	0	0	0
Ciclev10001014m	114.548	88.254	63.4529	103.362	76.8848	48.3748
Ciclev10001015m	5.67632	2.51223	0.383386	5.48572	2.29078	1.05623
Ciclev10001016m	0.163939	0.475435	0.0919033	0.0670923	0.593657	0.210994
Ciclev10001017m	5.48717	3.17043	2.33357	4.95587	5.25302	6.49391
Ciclev10001020m	0	0	0	0	0	0
Ciclev10001021m	20.3315	21.42	22.083	16.3163	12.6542	14.9916
Ciclev10001022m	8.87899	8.99521	10.5125	9.76747	11.1891	10.9094
Ciclev10001023m	36.5014	36.3379	36.3298	39.1539	38.1464	32.6925
Ciclev10001024m	0.270339	0	0.202067	0.368788	0.163159	0.927822
Ciclev10001026m	1.36508	0.659803	0.595197	0.931099	1.57908	1.3014
Ciclev10001029m	0.517347	0.666818	4.15697	1.27035	0.858649	6.95431
Ciclev10001030m	24.6023	23.8904	28.083	30.3877	33.0055	16.4289
Ciclev10001031m	7.05649	7.0182	6.54232	12.9954	10.1352	9.31475
Ciclev10001032m	9.14508	5.97782	4.29664	7.12882	4.65203	2.16717
Ciclev10001035m	51.4938	74.3378	112.067	54.6865	72.02	98.9715
Ciclev10001037m	0.47935	0.405459	0.13436	1.17704	0.542444	6.73488
Ciclev10001042m	20.0953	7.64393	3.46625	13.1876	6.35115	3.26478
Ciclev10001043m	5.66601	11.2588	10.2348	5.60381	5.84186	11.141
Ciclev10001045m	27.7915	19.1992	12.3118	12.6498	7.24106	9.30559
Ciclev10001046m	6.27366	8.20515	7.94422	6.10159	6.74863	4.17967
Ciclev10001047m	12.1155	9.55273	9.18229	7.81136	7.84315	3.71675
Ciclev10001048m	2.8866	2.34984	3.66226	11.5647	4.40124	4.23654
Ciclev10001050m	4.74825	3.80641	4.02522	2.98593	2.62109	2.33514
Ciclev10001051m	2.67636	4.39041	4.27372	10.4883	6.24082	2.36595
Ciclev10001054m	530.791	800.322	1738.11	399.371	740.309	1597.07
Ciclev10001055m	3.43901	2.72	3.50524	2.55894	1.34439	1.60949
Ciclev10001056m	0.656092	0.453026	0.105086	1.07402	0.678811	0.562938
Ciclev10001057m	0.708693	0.373683	0.794577	0.3164	0.116651	0.66335
Ciclev10001058m	6.27296	4.14905	3.10939	7.35033	6.45602	2.26623
Ciclev10001059m	0	0	0	0	0	1.21705
Ciclev10001060m	3.30766	2.80754	0.542708	2.50923	2.70228	1.73051
Ciclev10001062m	141.208	95.7868	88.098	95.9106	120.97	82.471
Ciclev10001063m	18.7394	14.7798	7.43325	14.7845	12.0652	8.93905
Ciclev10001065m	0	0	0	0	0	0
Ciclev10001068m	0.0853703	0.0825264	0	0	0	0
Ciclev10001069m	17.3505	17.918	15.088	9.62924	15.171	8.20602
Ciclev10001070m	0	0.0818674	0	0.207953	0.153337	0.217993
Ciclev10001071m	0	0	0.441346	2.01373	1.33636	6.58615
Ciclev10001072m	0.231072	0.223375	0	0	0	0
Ciclev10001073m	0.175523	0.0848378	0.393587	0.215498	0.1589	0.150601
Ciclev10001075m	12.0206	13.6449	17.5614	17.6653	14.757	17.5024
Ciclev10001076m	2.03892	0.88355	0.236483	1.20848	1.78218	0.9652
Ciclev10001077m	0.97713	0	0	0.159956	0.0884595	0.0838394
Ciclev10001078m	19.0569	16.8558	24.2209	17.682	18.0205	33.7614
Ciclev10001079m	4.80698	4.36523	4.00131	5.36525	3.29679	3.43706
Ciclev10001081m	11.505	16.5924	11.3652	13.7944	13.0615	9.71137
Ciclev10001082m	4.03812	11.339	32.7704	12.1191	6.78917	29.4506
Ciclev10001083m	0	0	0	0	0	0
Ciclev10001084m	30.8823	27.9909	24.6634	25.0143	25.8742	24.1095
Ciclev10001085m	0	0	0	0	0	0
Ciclev10001086m	5.88535	5.10364	2.91114	7.65079	2.58565	3.41599
Ciclev10001087m	0.0955461	0.27709	0.535625	0	0	0
Ciclev10001088m	0	0	0	0	0	0
Ciclev10001089m	0	0	0	0	0	0
Ciclev10001093m	0.148091	0.357895	12.2868	0	3.35167	35.9593
Ciclev10001095m	1.07025	0.0608585	0	1.54588	0.113988	0
Ciclev10001096m	16.7884	15.0084	15.075	16.1126	13.6518	3.69679
Ciclev10001098m	0.881746	0.619908	2.87593	3.14928	1.52392	3.71399
Ciclev10001099m	22.8451	18.3835	21.1139	24.0051	22.5262	15.5752
Ciclev10001100m	70.1041	74.9927	108.867	47.4792	77.2491	51.8152
Ciclev10001101m	0	0	0	0	0	0
Ciclev10001103m	1.04085	0.541789	0.359074	4.6529	0.144967	0.961767
Ciclev10001104m	10.1512	13.3521	15.3928	11.9864	9.71714	18.919
Ciclev10001105m	9.1569	7.78462	8.0822	8.45173	7.11388	5.57218
Ciclev10001106m	0	0	7.48151	0	0	2.18913
Ciclev10001108m	14.7834	11.6926	15.1568	7.11778	5.22454	6.24046
Ciclev10001110m	5.47997	5.45098	4.36318	4.9404	5.17671	3.33904
Ciclev10001111m	0.101006	0.195282	0.113246	0.413367	0.182881	3.55325
Ciclev10001114m	3.43651	0.86373	3.08238	21.0959	7.77769	0.353831
Ciclev10001115m	9.936	9.43501	8.08397	6.9811	7.40301	4.37579
Ciclev10001116m	0.192739	0.186319	0	0.0525858	0.0581623	0.110249
Ciclev10001117m	0.100491	0	0	0	0	0
Ciclev10001118m	0	0	0	0	0.083601	0
Ciclev10001119m	2.09665	1.3978	1.94544	1.18353	2.09445	1.4888
Ciclev10001120m	19.0069	15.759	20.2447	22.0194	27.2002	26.1559
Ciclev10001121m	8.27356	6.62688	10.2038	8.31978	6.58054	11.0032
Ciclev10001122m	2.05718	1.01462	5.88388	19.3122	2.77454	4.97108
Ciclev10001124m	17.343	15.4639	17.3138	19.7049	14.3385	20.1126
Ciclev10001125m	2.81107	2.21186	1.46592	3.95962	4.7938	0.897467
Ciclev10001126m	7.74567	11.0532	12.0754	9.29843	18.8326	18.1022
Ciclev10001128m	2.04184	2.72576	1.52619	2.46708	1.67243	1.25138
Ciclev10001130m	0.352842	0.085272	0	0.577603	0	0.302744
Ciclev10001131m	9.20333	5.90265	2.7781	18.4702	7.13007	0.379645
Ciclev10001133m	16.8792	18.0706	15.8295	10.975	10.4966	12.3847
Ciclev10001136m	10.4789	7.64513	5.98522	13.324	10.0235	3.84523
Ciclev10001138m	1.24135	0.32	2.78358	2.0321	0.899037	3.40833
Ciclev10001139m	0.943259	0.455919	1.32196	1.80147	0.853931	0.404666
Ciclev10001140m	108.174	140.701	145.8	141.855	169.253	121.824
Ciclev10001142m	73.093	66.9675	78.4988	129.33	158.71	84.3245
Ciclev10001143m	44.8738	41.7286	58.0591	54.495	61.0835	72.8896
Ciclev10001144m	26.9101	36.4513	45.5363	32.2912	37.0689	44.5397
Ciclev10001145m	3.98959	0.448453	0	2.96172	0.0839948	0
Ciclev10001146m	44.3915	46.0451	56.8554	49.7279	63.3615	50.4606
Ciclev10001147m	18.9393	17.4122	12.4734	15.7729	12.6495	4.88644
Ciclev10001148m	106.481	99.0875	117.981	102.958	92.3281	96.3576
Ciclev10001149m	3.5479	1.35593	0.555049	13.7094	1.19513	0
Ciclev10001150m	0	0	0	0	0	0
Ciclev10001152m	3.81112	2.38387	3.39325	2.70655	4.71867	2.35633
Ciclev10001154m	14.7777	17.6288	11.6333	6.17647	10.8165	9.77943
Ciclev10001155m	11.1611	70.6294	93.3797	19.7294	86.4374	172.859
Ciclev10001158m	0	0	0	0	0	0
Ciclev10001159m	3.72813	6.55261	2.73595	6.87969	7.42516	3.60592
Ciclev10001160m	0	0	0	0.0757377	0	0
Ciclev10001161m	42.619	36.1955	37.5336	35.3788	42.6603	22.9558
Ciclev10001162m	0.600318	0.09672	0.224356	1.63787	0.181156	0.515083
Ciclev10001163m	14.0472	15.8524	14.015	8.61057	17.4788	11.3094
Ciclev10001165m	0	0	0.116052	0	0	0.0888118
Ciclev10001166m	5.03306	4.62612	1.94267	4.52477	2.24087	10.0528
Ciclev10001167m	1.11351	1.17427	1.24845	0.828555	1.00806	0.347422
Ciclev10001170m	6.96764	4.70892	3.80231	5.50115	3.34928	2.59238
Ciclev10001173m	0.809918	2.64994	4.54034	1.47882	1.18443	5.61284
Ciclev10001174m	31.2639	36.0828	37.9656	24.5263	27.676	27.8653
Ciclev10001177m	0.170109	0	0	0.556936	0	0
Ciclev10001178m	45.1667	68.1825	77.153	58.4673	53.9266	38.824
Ciclev10001179m	2.20779	0.515164	0.341427	2.92872	3.44606	0.653216
Ciclev10001180m	0.104212	0.402964	0.584207	0.341192	0.28303	0.178832
Ciclev10001181m	14.8388	6.55307	19.2703	8.21357	9.51948	20.2429
Ciclev10001182m	9.10315	9.31253	5.74725	9.11474	5.44071	3.79158
Ciclev10001183m	3.61361	5.30702	3.58404	2.33206	3.33431	0.596257
Ciclev10001184m	4.28583	4.49417	3.58355	6.00515	5.85282	3.61499
Ciclev10001185m	40.6178	38.9263	34.744	41.9871	45.9641	47.3189
Ciclev10001186m	33.1684	36.4831	35.2783	29.1295	25.8073	41.9194
Ciclev10001187m	63.344	115.903	250.875	65.6263	134.632	215.295
Ciclev10001189m	0	0	0	0	0	0
Ciclev10001190m	2.69717	2.83738	3.29086	2.85694	1.50814	2.9268
Ciclev10001191m	128.265	135.37	176.215	200.73	170.481	212.482
Ciclev10001192m	18.7379	4.86321	0.735712	13.4273	2.50821	1.43884
Ciclev10001194m	12.8175	17.1186	18.7199	12.9759	14.8863	13.313
Ciclev10001195m	14.496	9.88702	13.273	10.9422	13.7065	11.9541
Ciclev10001196m	3.08296	3.67335	2.17041	5.4576	2.98573	3.2604
Ciclev10001198m	10.6568	10.8537	23.0432	12.9282	14.213	21.8797
Ciclev10001200m	76.4738	53.929	46.7568	56.7848	91.7445	40.9745
Ciclev10001202m	153.734	117.868	164.121	140.368	202.817	152.674
Ciclev10001203m	3.07886	1.88741	7.40912	5.65475	6.05046	9.02049
Ciclev10001207m	11.0005	6.55767	8.11963	21.7595	6.30721	13.3714
Ciclev10001211m	38.5078	38.9768	44.9522	39.3056	51.2663	40.2315
Ciclev10001212m	196.422	7.71797	0	175.387	32.4087	1.03123
Ciclev10001213m	2.47676	2.23464	1.29589	3.17599	2.01799	0.566694
Ciclev10001214m	49.3925	47.4151	64.0815	70.1161	93.4723	122.364
Ciclev10001215m	3.02227	5.28669	8.47131	3.94619	5.47211	11.7927
Ciclev10001219m	4.09657	4.34962	5.94833	2.69343	3.89101	2.88108
Ciclev10001220m	6.72995	3.69246	5.50619	5.13628	7.98627	2.96524
Ciclev10001223m	20.9794	15.3269	9.19241	26.1028	24.4502	16.2937
Ciclev10001224m	1.12424	0.0987992	0	2.34231	0.18505	0.0876926
Ciclev10001225m	0.666346	0.878384	0.611262	0.495822	0.274201	0.38982
Ciclev10001227m	87.7727	79.2172	76.7246	74.9573	68.3501	66.6464
Ciclev10001229m	9.58692	7.14702	5.28327	10.7064	6.54605	8.43487
Ciclev10001231m	4.37129	2.51257	2.98036	12.9578	5.82904	2.88901
Ciclev10001232m	4.30003	2.42041	2.86827	7.21736	4.87833	12.0025
Ciclev10001235m	0.210252	0	0	0.0860459	0.237927	0.0451
Ciclev10001239m	16.6009	11.452	11.8841	10.5258	13.0531	18.7243
Ciclev10001246m	29.9141	29.3493	22.5264	25.8004	24.8986	26.3564
Ciclev10001247m	27.7065	34.3563	45.9491	25.7825	29.935	58.7242
Ciclev10001248m	9.6903	13.0181	8.78757	10.0894	11.6753	7.45854
Ciclev10001249m	19.4875	7.98318	3.78267	14.2607	6.74683	2.03067
Ciclev10001250m	21.0649	14.1411	13.941	29.5743	36.2861	6.71502
Ciclev10001251m	50.3848	47.3478	43.018	40.3772	50.5754	28.8809
Ciclev10001254m	20.2944	22.6078	27.3045	22.148	18.1392	21.2825
Ciclev10001255m	17.0121	17.349	1.25761	58.2225	25.2171	0.160403
Ciclev10001261m	26.8419	16.2769	12.3223	30.1585	27.744	18.0136
Ciclev10001262m	69.6707	53.0755	65.0339	163.865	66.1009	119.277
Ciclev10001263m	0.215764	0.312864	0.362867	3.44375	2.44163	0.277693
Ciclev10001264m	12.8986	19.7677	13.139	22.66	18.5836	13.3616
Ciclev10001266m	2.51355	4.1397	27.8685	4.34328	9.10207	27.7971
Ciclev10001267m	285.233	359.172	291.987	255.55	293.561	262.282
Ciclev10001268m	19.5334	21.0856	37.0484	11.1917	10.3891	29.0506
Ciclev10001269m	12.4241	12.7609	12.0918	11.5109	10.0759	11.6225
Ciclev10001270m	10.1134	11.9713	10.182	7.93999	11.865	10.8026
Ciclev10001272m	37.8829	56.8828	88.3184	31.9212	51.3263	73.7055
Ciclev10001273m	19.7928	23.7942	64.3931	33.3009	31.4721	44.6337
Ciclev10001274m	2.84203	2.94838	2.25382	1.92905	2.19637	2.37903
Ciclev10001275m	18.7907	14.5606	14.5469	13.5492	15.3911	12.348
Ciclev10001277m	59.3775	63.0653	52.179	85.3793	93.8017	52.0844
Ciclev10001278m	22.8054	27.6619	33.1523	32.3643	31.3218	43.7477
Ciclev10001283m	23.2313	23.0852	30.1721	28.9947	20.3129	25.1328
Ciclev10001285m	9.748	8.29474	7.72252	7.59654	6.23553	7.66278
Ciclev10001288m	23.2912	23.2917	32.7922	26.8428	24.3574	31.5268
Ciclev10001289m	1.18201	0.734551	1.60924	0.829265	1.52868	0.941742
Ciclev10001290m	41.7671	54.9392	49.3915	37.0778	51.1681	38.7787
Ciclev10001291m	0.148091	0.143158	0	0.606064	0.335167	0.190597
Ciclev10001292m	1.71745	0.830119	0.534883	1.95241	1.20929	1.39173
Ciclev10001293m	0.0887785	0.0858211	0	0.290661	0.401855	0
Ciclev10001295m	37.2876	27.7903	34.863	39.9641	34.1696	40.2714
Ciclev10001297m	35.4039	49.7087	33.2325	45.4582	41.1311	38.0196
Ciclev10001298m	73.0635	54.1543	57.7538	91.5179	86.0015	77.3129
Ciclev10001299m	0	0	0	0	0	0
Ciclev10001303m	13.6555	16.3606	17.3202	12.2559	13.4124	12.4857
Ciclev10001304m	4.37802	3.35888	7.86931	5.51732	4.90709	8.94385
Ciclev10001305m	46.6436	27.7022	26.4044	17.6541	16.7664	11.5093
Ciclev10001308m	12.5017	7.45683	15.1102	37.0842	7.86624	5.40136
Ciclev10001309m	0.402614	0.389202	0.852655	0.549234	0.566979	0.614133
Ciclev10001310m	21.8504	26.0809	15.4121	43.41	16.7165	8.80188
Ciclev10001314m	327.499	339.601	573.964	171.568	234.334	203.901
Ciclev10001315m	29.2713	23.7895	26.9061	23.7709	16.1901	17.1151
Ciclev10001318m	32.5744	35.4171	29.8044	32.919	36.8464	15.3633
Ciclev10001322m	4.92403	7.14001	4.76793	5.55697	7.69971	7.04151
Ciclev10001325m	0.319891	0.0773087	2.06228	1.2437	0.796392	5.83253
Ciclev10001326m	6.09077	5.62025	6.00115	2.64372	2.33926	2.61299
Ciclev10001327m	59.7421	33.5496	56.3346	40.6314	45.5654	47.4078
Ciclev10001330m	19.2364	26.3732	41.249	24.725	28.8038	45.3107
Ciclev10001331m	23.6827	22.1733	30.5449	22.8409	20.6153	42.4165
Ciclev10001332m	22.9028	25.3153	16.9825	20.0903	20.1556	8.4554
Ciclev10001333m	18.7948	16.4816	15.8796	17.3614	12.7004	13.7073
Ciclev10001334m	12.4806	11.9516	16.1611	11.9899	17.6111	15.7864
Ciclev10001335m	2.7148	27.837	1.6306	3.49182	2.80881	8.90142
Ciclev10001336m	6.23443	5.43396	3.09392	2.175	4.71878	0.964619
Ciclev10001337m	0	0	0	0.0639372	0.0707175	0
Ciclev10001338m	12.1223	12.6362	8.84257	13.09	17.3209	11.341
Ciclev10001340m	0.1872	0.0904821	4.51256	1.83868	0.423681	8.51291
Ciclev10001341m	11.7617	14.0544	16.0259	18.7859	18.8555	18.7818
Ciclev10001344m	2.43729	3.96253	2.48423	6.34748	4.4631	1.09315
Ciclev10001346m	0	0	0	0	0	0
Ciclev10001347m	5.09001	5.49094	9.09788	8.87578	11.0859	6.32945
Ciclev10001348m	6.34789	7.48345	7.72472	4.11858	5.32624	14.6792
Ciclev10001350m	0	0	0	0	0	0
Ciclev10001352m	51.5475	32.1457	17.4131	23.9424	13.8014	9.97393
Ciclev10001354m	7.16399	4.31201	5.38003	7.63391	10.3402	2.66749
Ciclev10001355m	16.0968	12.3712	15.133	17.1852	14.0294	13.8114
Ciclev10001356m	6.1083	7.51522	6.93748	9.34999	6.17618	8.37202
Ciclev10001357m	17.5901	25.5872	28.5496	23.7216	24.4173	32.1976
Ciclev10001358m	1.38085	0.924131	0.833643	0.782467	1.15393	1.27593
Ciclev10001360m	4.66402	5.71829	6.6322	6.51769	4.94322	8.00361
Ciclev10001364m	74.7676	80.1618	146.72	89.1901	103.636	150.834
Ciclev10001370m	39.6149	54.0732	41.1972	22.9592	32.2993	27.7974
Ciclev10001371m	146.421	94.1716	72.3087	209.488	233.695	181.186
Ciclev10001373m	1.53778	0.72204	0.44335	0.359621	0.318206	0.22619
Ciclev10001374m	12.9596	26.1873	57.8391	27.6477	58.1316	98.4257
Ciclev10001376m	0.988064	0.881677	0.255647	1.55525	2.20183	0.717349
Ciclev10001378m	27.7295	35.4915	22.753	40.5116	38.637	33.4954
Ciclev10001380m	15.2105	22.7836	35.3739	46.4709	33.5388	80.8893
Ciclev10001382m	1101.01	322.544	215.27	471.529	468.955	183.163
Ciclev10001383m	84.4945	44.2051	46.1624	44.0421	30.5037	24.043
Ciclev10001384m	26.0224	26.0382	26.3095	22.794	31.4934	27.8116
Ciclev10001386m	9.45672	6.67489	13.2114	12.1634	14.4724	13.459
Ciclev10001388m	22.4271	44.8801	98.5386	0.948312	1.72315	26.2725
Ciclev10001389m	1.08206	0.523009	0.707697	1.40231	1.63265	1.62475
Ciclev10001390m	12.3369	16.2773	25.5143	3.20672	3.99956	3.07544
Ciclev10001393m	16.8935	57.5265	53.4008	3.21152	9.07755	40.9599
Ciclev10001394m	25.4879	21.1191	10.206	15.3026	15.6575	12.1962
Ciclev10001395m	0	0	0	0	0	0
Ciclev10001396m	24.4039	16.5309	33.5525	18.0792	25.6943	40.2476
Ciclev10001397m	0	0	0	0	0	0
Ciclev10001398m	1.423	2.52193	15.5113	4.33538	4.86669	34.526
Ciclev10001399m	1.11098	0.644384	0	0.636538	0.100577	0
Ciclev10001400m	62.1624	67.3054	52.6372	61.9692	72.6729	54.331
Ciclev10001401m	0	0	0	0	0	0
Ciclev10001403m	0	0	0	0	0	0
Ciclev10001405m	149.633	183.996	206.669	570.663	571.905	376.004
Ciclev10001406m	1.26068	0	0	1.78232	0.311263	0
Ciclev10001407m	10.9866	9.48892	9.89482	6.92869	7.66344	7.34046
Ciclev10001408m	0	0.0870543	0.100968	0	0	0
Ciclev10001409m	18.3717	25.5707	27.2734	20.4674	15.7849	14.6686
Ciclev10001411m	9.28639	8.39788	11.3354	10.911	8.74596	10.988
Ciclev10001412m	0	0.0792862	0	0	0	0
Ciclev10001413m	0	0	0	0	0.0889005	0
Ciclev10001414m	2.7636	0.296838	0	1.17289	0	0
Ciclev10001415m	200.334	444.649	1052.14	218.072	548.448	1484.81
Ciclev10001416m	45.4491	4.42456	0.540179	38.3832	2.68969	0.0688977
Ciclev10001417m	1.71225	1.94307	1.33548	3.22949	2.22405	0.830381
Ciclev10001418m	15.5577	13.7429	14.9368	12.0753	8.98483	7.59496
Ciclev10001419m	1.06383	1.09696	0.397586	2.26395	0.706265	2.00813
Ciclev10001420m	0	0	0	0	0	0
Ciclev10001421m	1.84999	1.41187	1.85585	2.78935	3.52588	2.84047
Ciclev10001422m	0	0	0	0	0	0
Ciclev10001423m	3.20416	3.91733	4.5434	5.0138	3.58324	6.06446
Ciclev10001424m	0	0.776578	0.112587	0.821917	0.636354	1.72319
Ciclev10001426m	3.06195	2.54885	6.29387	2.64545	2.54099	12.2603
Ciclev10001427m	45.7188	48.6985	76.4069	32.7873	44.2436	63.4526
Ciclev10001428m	4.70186	7.76186	4.05512	2.48671	4.97694	3.47568
Ciclev10001429m	0.0861706	0.1666	1.73904	0.352654	0.702092	0.961166
Ciclev10001432m	1.05247	0.184983	0.107274	1.87951	0.433089	1.3135
Ciclev10001433m	0.439366	0.254838	0.0985222	0.143849	0	0
Ciclev10001434m	25.2818	27.6688	52.2648	25.1674	26.874	77.7141
Ciclev10001435m	1.6694	0.189858	0.110101	1.36641	0.177801	0
Ciclev10001436m	69.8899	85.8347	70.7374	71.9303	59.2183	34.2159
Ciclev10001437m	72.2001	78.3373	85.6783	79.5615	81.6351	66.1707
Ciclev10001438m	2.18153	5.65175	0	3.14264	4.18688	3.51897
Ciclev10001439m	0.842973	7.42458	46.6264	0	5.00283	69.5961
Ciclev10001440m	114.751	144.539	311.179	267.333	200.249	484.137
Ciclev10001443m	49.1478	16.1902	59.5747	60.3005	68.9513	277.738
Ciclev10001445m	103.855	46.0756	16.6799	27.8439	15.1838	3.33346
Ciclev10001446m	0.472491	0	0	2.86184	0.684394	0
Ciclev10001449m	23.1053	22.3356	20.0436	19.1878	26.6427	16.7859
Ciclev10001450m	0.221661	0	0	0.0907148	0	0
Ciclev10001451m	8.13737	3.39681	4.14705	4.16278	0.167426	0.0793409
Ciclev10001453m	9.54374	5.84851	12.7066	16.1113	15.2742	13.0873
Ciclev10001454m	314.039	261.968	159.056	255.097	265.633	123.107
Ciclev10001456m	0	0.395784	0	0	0	0
Ciclev10001457m	2.48997	3.16351	2.55243	4.13431	3.28464	1.58706
Ciclev10001458m	2.61725	1.98791	1.15281	1.83619	2.70788	1.44363
Ciclev10001459m	129.276	134.967	227.415	66.9794	95.675	221.842
Ciclev10001460m	0.686423	0.947939	0	0.481575	0.44387	0.168275
Ciclev10001461m	0.191357	0.0924915	0.107274	1.95783	0.259854	0.0820939
Ciclev10001463m	4.9706	6.69552	6.30385	6.2694	5.75394	7.83056
Ciclev10001464m	18.3414	23.3844	15.5345	10.0393	11.0011	12.6678
Ciclev10001467m	4.15002	0.267452	0.206798	1.50969	0.0834892	0.316515
Ciclev10001468m	41.1561	22.0476	39.9912	26.7385	31.2817	28.9122
Ciclev10001469m	5.99837	5.10619	9.03397	5.20279	4.86297	10.8311
Ciclev10001476m	12.9393	12.2654	14.7891	14.7038	15.6376	15.3059
Ciclev10001478m	5.79516	10.9534	6.59443	19.8937	6.57752	13.8038
Ciclev10001479m	504.706	331.073	191.038	462.844	228.487	97.6471
Ciclev10001480m	67.3393	75.2778	17.907	29.0426	20.5552	6.96302
Ciclev10001481m	3.88209	5.00369	2.7698	3.46636	1.91697	5.45056
Ciclev10001482m	9.08317	1.84855	0	6.10419	0.432789	0
Ciclev10001485m	4.87954	3.81374	3.25924	5.69344	4.88739	3.0287
Ciclev10001487m	54.7223	75.099	99.1617	48.7732	67.1612	102.549
Ciclev10001488m	26.3374	22.3795	32.6817	16.4172	22.3159	36.7518
Ciclev10001489m	66.8869	96.9398	94.4975	95.2549	110.787	83.1255
Ciclev10001491m	6.51368	4.61758	4.26011	8.35262	6.68308	9.2216
Ciclev10001493m	6.72069	8.88535	9.30812	13.8331	12.7948	15.349
Ciclev10001494m	7.10228	3.34702	5.27547	6.39454	3.29522	1.29495
Ciclev10001495m	0.715427	1.48199	0.802127	0.501924	0.832726	0.964619
Ciclev10001496m	8.76272	8.83128	10.3472	5.72257	7.42653	8.79831
Ciclev10001500m	0.103508	0	0	0	0	0
Ciclev10001502m	2.49168	0	0	2.19051	2.08863	9.8977
Ciclev10001505m	26.1938	27.2842	32.3277	17.7833	24.7243	34.0606
Ciclev10001506m	41.1547	44.973	54.0612	51.5684	52.4331	43.0686
Ciclev10001508m	0	0.0615045	0	0	0	0
Ciclev10001509m	15.6118	21.6376	20.878	18.1667	20.1784	21.4646
Ciclev10001510m	0	0	0	0	0	0
Ciclev10001511m	1.9826	9.90218	17.1345	2.50175	0.29914	11.8368
Ciclev10001512m	4.49798	5.10435	11.0728	4.24185	6.28508	7.88649
Ciclev10001513m	0.0886073	0.256967	0.496726	0.14505	0.160432	4.94173
Ciclev10001514m	0.443037	2.74098	5.36465	0	0	0
Ciclev10001515m	1.01006	0.569573	0.188744	0.206683	0.304802	0.0722206
Ciclev10001518m	6.58834	7.68924	8.6479	4.53764	7.1282	5.99759
Ciclev10001522m	0	0	0	0	0	0
Ciclev10001524m	156.967	68.4277	133.27	87.7872	62.3692	75.8638
Ciclev10001525m	22.42	12.9022	16.4385	24.4856	11.071	13.9339
Ciclev10001527m	38.8234	49.3987	59.1538	55.5419	113.326	113.884
Ciclev10001528m	1.94903	2.12986	1.42515	2.63569	1.07402	1.38147
Ciclev10001531m	96.5183	112.005	119.343	122.327	157.437	100.957
Ciclev10001533m	11.6028	11.7577	9.24078	8.51445	10.7938	7.82699
Ciclev10001534m	14.1928	15.4934	14.1808	13.0393	12.5865	20.2961
Ciclev10001538m	13.9354	27.7001	32.1271	28.3727	24.8371	38.8595
Ciclev10001539m	11.4894	7.40445	9.90231	9.65999	6.15591	6.1697
Ciclev10001543m	0	0	0	0.302545	0	0
Ciclev10001544m	1.04846	0.126692	0.14694	0.697262	0.118647	0.056225
Ciclev10001546m	50.5255	25.9531	25.7113	68.5183	29.9593	23.3555
Ciclev10001547m	0	0	0	0	0	0
Ciclev10001550m	66.8857	45.2909	67.6514	28.5351	42.4147	25.1077
Ciclev10001551m	66.9825	60.4461	36.8876	38.0131	28.7974	52.1694
Ciclev10001552m	7.25158	3.32526	2.39742	7.22904	2.94577	1.75492
Ciclev10001555m	0	0	0	0.597537	0.755318	0.268451
Ciclev10001558m	9.44335	10.0417	14.3994	7.34293	8.63455	5.50974
Ciclev10001559m	428.823	563.434	500.839	306.093	456.721	324.354
Ciclev10001560m	5.81966	5.42122	1.06771	5.36965	6.60961	4.63021
Ciclev10001561m	44.8087	51.3129	20.2244	36.4879	22.3629	3.74608
Ciclev10001562m	12.0997	19.1609	21.1523	7.42772	16.647	14.07
Ciclev10001563m	397.91	135.458	57.8189	217.656	83.2864	75.7146
Ciclev10001564m	22.6997	42.8079	27.2238	16.8284	34.0255	99.3793
Ciclev10001565m	13.0213	18.6962	89.5283	11.3633	5.54739	44.1972
Ciclev10001569m	21.3775	16.5439	25.382	22.6583	27.29	23.4431
Ciclev10001571m	8.94027	8.47299	13.6598	10.9764	8.88711	11.1303
Ciclev10001572m	0	0	0	0.407766	0.112752	0
Ciclev10001575m	54.3697	63.5789	168.346	94.4264	75.2426	285.168
Ciclev10001576m	31.089	30.4018	28.3904	25.9627	35.5686	50.1024
Ciclev10001578m	0	0	15.8998	0	0	0.506989
Ciclev10001580m	0.134314	0.519358	0.301181	0.329808	0.182391	0.115243
Ciclev10001581m	26.8539	21.149	18.9499	14.8172	12.1943	9.05449
Ciclev10001582m	38.9763	49.0462	39.5557	58.3039	41.1661	52.1815
Ciclev10001583m	4.1271	4.46296	7.05851	2.97725	3.86291	4.20133
Ciclev10001591m	40.3639	52.0257	75.923	82.6552	87.338	65.5868
Ciclev10001595m	2.76723	3.30447	1.73379	2.93115	2.35781	1.676
Ciclev10001596m	0	0.233415	0	0.0988171	0	0
Ciclev10001597m	54.2906	44.7522	37.4657	47.5372	41.6054	24.9883
Ciclev10001599m	21.0808	17.0992	10.1877	19.3371	16.5617	18.7114
Ciclev10001600m	45.5843	49.0638	35.6503	31.4567	47.5082	32.8275
Ciclev10001601m	12.4318	6.59035	13.9384	13.4579	22.7269	14.9334
Ciclev10001602m	10.4506	8.88535	17.2228	15.2527	9.57495	12.2079
Ciclev10001604m	66.2045	83.4542	75.4528	23.1065	24.8973	13.9863
Ciclev10001605m	10.89	11.1067	10.9775	10.0583	8.77332	7.20071
Ciclev10001606m	129.336	160.684	134.265	100.523	115.776	122.167
Ciclev10001611m	160.364	208.483	168.744	96.0164	145.666	117.042
Ciclev10001613m	3.71225	2.51201	0.99891	2.30925	1.47871	0.445924
Ciclev10001614m	7.32708	1.99521	3.7604	4.18116	5.04497	3.67466
Ciclev10001615m	2.94772	2.52572	2.10315	7.34781	3.88156	3.16149
Ciclev10001616m	3.90207	4.25568	1.79485	2.5387	7.7897	4.03481
Ciclev10001617m	6.93841	8.87092	14.3038	15.5107	10.6715	14.2751
Ciclev10001618m	10.1955	5.69651	1.67795	8.03878	2.96375	0.481536
Ciclev10001620m	0	0	0	3.34722	0.969618	0
Ciclev10001621m	23.1807	20.6526	26.7656	19.5398	28.2677	31.6894
Ciclev10001622m	0	0	0	0	0	0
Ciclev10001623m	0.270516	1.04602	1.92089	0	0	0
Ciclev10001624m	5.3525	3.03315	4.65606	4.15442	4.59498	2.69217
Ciclev10001625m	59.268	44.7933	49.4016	49.0499	28.8329	33.902
Ciclev10001626m	0	0	0	0	0	0
Ciclev10001627m	19.1666	12.8095	13.884	19.8196	24.9204	18.2725
Ciclev10001629m	0	0	0	0.0871422	0	0
Ciclev10001630m	0.555044	4.72168	11.2015	1.09033	1.90943	12.3822
Ciclev10001634m	33.5757	28.1022	28.4003	36.0394	36.3214	28.0063
Ciclev10001635m	4.16649	4.88206	3.82206	5.11542	4.68633	4.27907
Ciclev10001636m	5.99831	8.27139	6.82413	18.1945	13.2562	12.8666
Ciclev10001637m	3.53305	4.71644	2.26355	3.16721	5.71155	2.09312
Ciclev10001638m	0.184076	0.533833	0.103192	0.301333	0.083322	0.0789702
Ciclev10001639m	28.1922	41.6019	56.8511	35.1431	34.8115	67.8671
Ciclev10001640m	3.06532	1.8037	2.24139	3.59983	3.86092	4.63126
Ciclev10001644m	10.9672	7.95137	8.16821	7.56602	8.79388	7.25915
Ciclev10001645m	3.42654	1.39469	3.53849	1.62373	1.71429	3.09476
Ciclev10001646m	89.135	138.102	132.944	131.122	192.185	120.964
Ciclev10001647m	17.2853	11.0737	19.036	13.3946	11.5742	13.6902
Ciclev10001648m	0	0	0	0	0	0
Ciclev10001649m	0.195426	0.755664	1.09554	2.71926	11.6767	15.2588
Ciclev10001652m	0	0	0	0.381505	0	0
Ciclev10001653m	0	0.114404	0	0	0	0.101543
Ciclev10001655m	3.57312	1.19107	0	1.41188	0	0
Ciclev10001657m	76.2944	129.978	134.547	56.3529	97.8547	96.5018
Ciclev10001658m	31.8848	42.776	62.09	20.4589	7.19633	48.4254
Ciclev10001659m	12.4413	8.34621	18.4584	14.9237	12.5253	8.23618
Ciclev10001660m	7.38999	3.83847	3.83362	9.93073	4.59324	22.0506
Ciclev10001661m	4.42555	0	0	21.7339	0.231141	0.073023
Ciclev10001665m	4.49993	1.08751	0	3.37627	0.792125	0.107251
Ciclev10001672m	119.152	101.991	165.216	146.152	139.128	158.634
Ciclev10001675m	0	0.247503	0	0	0.231785	0
Ciclev10001676m	23.1829	39.5343	77.0618	64.9434	50.1039	177.341
Ciclev10001677m	0	0	0	0.0782588	0	0
Ciclev10001679m	0.788973	1.62072	0.663439	2.01805	0.982103	1.3539
Ciclev10001682m	12.7076	11.8025	36.4104	15.9077	17.369	53.8752
Ciclev10001683m	9.93679	10.0861	4.31713	4.57497	22.1521	6.1813
Ciclev10001685m	1.7088	0.956348	2.42006	2.42924	0.814196	3.85836
Ciclev10001686m	31.4994	30.8393	33.5114	38.0557	24.0522	24.0912
Ciclev10001687m	14.0976	12.6852	9.34446	7.11204	2.00669	5.17313
Ciclev10001688m	2.03467	2.06055	2.06398	0.713733	0.701708	0.748191
Ciclev10001689m	95.9916	102.209	109.445	54.5644	59.2731	68.2485
Ciclev10001690m	62.7264	40.6837	24.9454	117.018	65.6034	7.59004
Ciclev10001691m	9.75102	10.4306	13.4418	9.87839	7.88694	9.53236
Ciclev10001692m	2.15587	3.87039	1.84162	6.21805	3.34578	0
Ciclev10001693m	3.25596	2.27922	1.63645	2.48121	0.914778	0.481667
Ciclev10001694m	8.39579	8.50725	11.2278	13.4955	13.4157	21.7414
Ciclev10001697m	2.90537	3.82989	6.07072	1.5133	0.239112	1.81299
Ciclev10001700m	6.0337	5.2876	4.67853	5.35399	6.0749	5.70924
Ciclev10001701m	0.285058	11.941	22.4787	5.59968	9.4623	52.4226
Ciclev10001702m	32.6278	25.7423	12.8393	11.3816	6.82911	3.35319
Ciclev10001704m	0.792373	0.109425	0	1.85302	0.102476	0.0971242
Ciclev10001705m	75.1517	58.7057	58.1941	69.5114	57.7265	29.1469
Ciclev10001706m	40.8365	26.9331	40.8766	51.4076	34.5191	38.9999
Ciclev10001708m	9.03515	5.54284	7.40276	10.4529	2.28083	2.31079
Ciclev10001709m	20.5812	20.4464	22.5963	34.4493	29.9791	28.5967
Ciclev10001711m	8.731	4.1737	8.4982	5.65424	4.42981	7.73831
Ciclev10001712m	0	0	0	0	0	0
Ciclev10001713m	74.4959	108.559	205.466	22.7519	41.3614	66.0869
Ciclev10001715m	0	0	0	0.0703987	0	0
Ciclev10001717m	0	0	0	0	0	0
Ciclev10001718m	0	0	0	0	0	0
Ciclev10001719m	0	0	0	0	0	0
Ciclev10001720m	4.16727	4.30156	7.76074	5.31871	7.86496	8.66625
Ciclev10001721m	0.0927189	0.0896302	0	1.82137	0.587568	0.238663
Ciclev10001722m	18.7965	38.1855	99.7022	52.4807	79.8997	98.8131
Ciclev10001723m	0	0	0	0	0	0
Ciclev10001724m	6.2292	5.70054	4.00421	3.53503	3.53396	6.34245
Ciclev10001726m	35.1262	28.7697	1.58894	34.5507	15.5791	0.260567
Ciclev10001727m	16.4256	17.143	14.6677	13.8013	17.5677	14.0934
Ciclev10001729m	5.36026	2.88816	1.67488	4.38738	2.38655	0.90476
Ciclev10001730m	0.508287	0.122839	0	0.312025	0.115038	0
Ciclev10001733m	5.17833	4.55888	6.1169	6.50907	6.69705	6.50596
Ciclev10001734m	16.9033	11.5537	39.1478	18.3074	14.9934	47.6119
Ciclev10001735m	6.64718	6.49795	10.8023	4.76828	10.6831	5.31889
Ciclev10001736m	4.4444	5.79073	5.52463	4.98213	4.89819	8.62153
Ciclev10001737m	0.0706679	0	0	0.115683	0	0
Ciclev10001739m	24.8333	10.6852	19.9939	34.5604	33.1554	19.0313
Ciclev10001740m	11.036	7.11223	16.0682	23.7742	11.5866	45.7671
Ciclev10001741m	0.122881	0.237576	0.688865	0.100579	0	0
Ciclev10001742m	15.8781	15.4445	16.9177	7.66858	8.4818	22.1702
Ciclev10001743m	0.664982	0	0.248523	1.99572	1.00335	0.66566
Ciclev10001744m	9.6381	7.59338	4.37647	6.94214	8.68174	5.58201
Ciclev10001747m	0.727082	0.878577	1.22279	0.743897	0.905062	2.02751
Ciclev10001749m	5.42273	6.15946	2.27996	0	1.10457	0.11632
Ciclev10001751m	0	0	0	0	0	0.379462
Ciclev10001753m	0.0729487	0.0705186	0.572523	0.955337	0.0660404	0.312956
Ciclev10001754m	2.37995	6.42601	10.8575	3.15709	6.09223	9.08355
Ciclev10001756m	4.4069	3.18337	8.19873	18.5109	6.5762	13.0887
Ciclev10001757m	0.675848	0	0	0	0	0
Ciclev10001758m	12.0312	7.87401	6.45136	11.9883	9.60646	7.63002
Ciclev10001759m	26.0385	24.6279	9.55631	27.2923	16.8739	17.9214
Ciclev10001762m	13.2219	13.4867	13.5974	6.71721	6.85169	6.49384
Ciclev10001764m	31.0159	25.3211	40.5499	25.2969	25.003	29.9035
Ciclev10001765m	0.831992	0.804277	0.399779	0.389135	0.430401	0
Ciclev10001766m	0.160785	0.544001	0.811214	1.44763	5.67678	2.06934
Ciclev10001767m	11.6126	5.40877	6.62829	7.69033	8.41029	6.88407
Ciclev10001768m	47.5424	69.9928	55.3137	19.8395	34.3615	34.3056
Ciclev10001769m	2.86533	3.91042	3.68501	8.62234	5.26426	6.21856
Ciclev10001771m	0	0	0	0	0	0
Ciclev10001773m	82.4672	139.82	148.304	103.493	169.801	160.032
Ciclev10001775m	2.66237	2.1141	1.91894	0.311308	0.344321	0.244753
Ciclev10001779m	2.31525	1.56669	0.129791	3.50581	3.35359	0.993261
Ciclev10001782m	1.4437	1.5119	0.539551	1.08319	0.544574	0
Ciclev10001783m	0.255557	0	0	0	0	0.219272
Ciclev10001784m	5.7923	6.23026	7.40892	5.47552	5.0222	9.30979
Ciclev10001785m	20.3859	15.7654	27.1871	30.9128	26.1289	22.4627
Ciclev10001787m	3.26151	2.65127	3.73987	3.27627	5.50265	2.54403
Ciclev10001788m	21.9849	29.3406	35.5267	29.7968	26.4298	45.1347
Ciclev10001790m	1.06937	0.516876	0.599484	2.56333	3.18091	2.75262
Ciclev10001792m	23.9779	15.7192	25.8022	16.8061	18.0269	18.5043
Ciclev10001793m	0	0	0	0.0783131	0.173236	0.164188
Ciclev10001794m	9.60063	8.99378	10.3202	11.3416	9.94588	12.8233
Ciclev10001796m	24.3625	26.851	37.8407	25.9102	36.9462	44.6028
Ciclev10001800m	10.0192	12.5279	48.1082	128.894	21.0985	98.4877
Ciclev10001802m	64.1667	46.5947	51.3394	32.3013	41.7266	34.2054
Ciclev10001803m	0	0	0.443774	0.215979	0.238883	2.03766
Ciclev10001804m	12.359	10.0872	9.37611	19.9894	18.5583	12.2552
Ciclev10001805m	22.2795	11.493	10.7535	11.6938	7.50707	3.00029
Ciclev10001807m	44.0635	40.7045	75.515	54.7471	32.2161	92.7195
Ciclev10001810m	0.486754	0.823443	0.136435	0.49801	0.220329	0.313232
Ciclev10001811m	0.508007	0.196434	0	1.24741	0.183959	0
Ciclev10001812m	10.249	1.33673	6.11029	15.7123	10.6775	32.1043
Ciclev10001813m	11.9077	13.3185	12.799	8.5382	15.0564	13.51
Ciclev10001815m	0	0	0	0	0	0
Ciclev10001816m	1.0532	0.185111	0	0.548572	0.086678	0
Ciclev10001818m	8.32957	13.5804	47.2525	16.1795	21.7219	64.8555
Ciclev10001820m	0.257226	0	0.288398	3.4739	0	0
Ciclev10001821m	67.9705	60.6977	63.2109	40.3238	32.5158	18.8372
Ciclev10001822m	10.7167	3.15934	13.2084	13.9351	3.7844	68.6046
Ciclev10001823m	5.93114	7.44357	7.11657	5.45083	9.4201	3.83908
Ciclev10001824m	2.76272	2.03481	0.442504	2.26129	2.50109	0.564396
Ciclev10001826m	14.7488	12.0519	16.2621	26.2114	15.2701	18.6675
Ciclev10001827m	25.7271	23.4679	30.0432	29.6182	34.9707	37.9259
Ciclev10001828m	7.24542	7.41009	8.12346	7.99313	6.55927	5.58601
Ciclev10001829m	17.7936	25.2209	20.3171	11.5262	19.0733	25.1956
Ciclev10001832m	2.76933	2.77269	0.332671	6.15247	3.0443	0.169724
Ciclev10001834m	6.6356	4.09819	4.64984	3.7717	6.34094	5.77253
Ciclev10001835m	55.8236	35.7647	43.791	37.7186	36.8005	43.4775
Ciclev10001840m	43.9375	38.2997	72.1945	41.1093	66.2487	56.0287
Ciclev10001842m	21.4121	9.59213	29.2768	10.6865	12.6471	18.3719
Ciclev10001844m	11.5322	2.26273	0.128018	7.75692	0.206735	0.293906
Ciclev10001847m	21.4973	22.0965	13.2208	69.6398	58.8772	31.8313
Ciclev10001849m	24.7862	13.742	4.69976	39.6799	11.9619	1.32918
Ciclev10001851m	78.4606	40.3348	81.2569	78.6975	36.5416	129.504
Ciclev10001852m	9.18388	8.32308	11.4552	9.02042	15.4851	25.7082
Ciclev10001853m	15.8896	13.2335	12.5163	16.8073	18.5159	14.0531
Ciclev10001854m	506.104	86.2077	188.592	1844.79	322.313	1662.03
Ciclev10001855m	0.215427	0	0	0.0881634	0	0
Ciclev10001857m	0.136643	0	0.153202	0.111843	0	0.468969
Ciclev10001859m	61.1276	72.809	67.2174	57.318	58.6834	38.9041
Ciclev10001860m	3.32848	0.500516	0.497579	2.42166	0.267846	0.190393
Ciclev10001861m	20.9852	16.7361	24.1166	16.06	17.858	23.4974
Ciclev10001862m	62.4431	45.2293	43.6817	70.4761	76.7419	35.7945
Ciclev10001863m	0	0.13157	0	0.111401	0.123215	0
Ciclev10001864m	6.85509	5.46706	2.78611	12.5544	6.28348	1.10283
Ciclev10001866m	20.2336	20.2476	29.0695	23.5519	25.7733	35.8556
Ciclev10001867m	33.3544	6.86771	13.9056	41.493	5.34148	2.99618
Ciclev10001868m	1.04891	0.563314	0	0	0.105508	0
Ciclev10001869m	28.5708	30.3446	34.7729	23.7699	17.527	27.7398
Ciclev10001872m	10.8561	7.87088	0.608588	10.3075	4.22606	6.61347
Ciclev10001873m	14.7001	6.18842	5.71539	8.92702	9.98101	6.81507
Ciclev10001875m	16.3064	18.0873	25.4315	11.379	19.0205	22.1527
Ciclev10001877m	0	0	0	0	0	0
Ciclev10001879m	35.4625	28.8347	24.7479	30.5452	36.0047	37.7641
Ciclev10001881m	0	0.68058	2.23649	0	0	0
Ciclev10001885m	7.64245	17.3876	17.2238	49.4742	41.7918	12.2536
Ciclev10001886m	3.44204	2.31068	3.21598	2.50428	3.54887	3.85574
Ciclev10001887m	22.8154	15.9385	12.8901	13.2764	11.9411	12.7703
Ciclev10001888m	760.621	533.121	442.72	565.538	384.188	449.479
Ciclev10001889m	20.1261	18.8192	11.9152	22.6314	15.4105	16.7843
Ciclev10001891m	6.64448	5.78083	9.93293	5.89172	6.21575	8.83667
Ciclev10001892m	2.27455	4.14386	3.04062	1.86172	1.50477	1.65136
Ciclev10001893m	2.07904	3.70223	3.06709	3.76164	2.47651	2.62883
Ciclev10001894m	65.0892	48.7759	45.3985	50.5911	45.45	37.5564
Ciclev10001896m	6.77226	11.364	12.0341	5.33393	7.05634	4.38544
Ciclev10001897m	0	0	0	0	0	0
Ciclev10001898m	0.126026	0.121828	0	0.412611	0	0
Ciclev10001901m	1.95616	0.490258	2.43691	58.8263	18.2338	8.82723
Ciclev10001904m	9.84137	12.2317	8.9323	17.4145	17.14	9.007
Ciclev10001905m	0	0	0	0	0	0
Ciclev10001906m	0.133339	0.128898	0	0	0	0
Ciclev10001907m	3.00625	3.20674	2.78944	1.35758	3.75387	5.95934
Ciclev10001908m	26.0753	29.3027	31.4279	35.3043	37.2777	39.7121
Ciclev10001909m	1.07994	0.115997	0	0.294645	0	1.02957
Ciclev10001912m	2.31525	1.11906	1.68729	1.13702	1.048	1.29124
Ciclev10001913m	4.13324	0.951322	0	2.49702	1.15818	0.337751
Ciclev10001914m	7.89581	11.8406	8.39869	10.1912	18.7866	9.64097
Ciclev10001916m	0.115568	0	0	0	0.209248	0
Ciclev10001923m	0.608903	0.336354	0.780221	0.284793	0.236245	0.0746355
Ciclev10001924m	0	0	0	0	0	0
Ciclev10001927m	0	0	0	0	0.122249	0
Ciclev10001930m	0	0	0	0	0	0
Ciclev10001931m	35.039	37.518	30.2708	45.9034	38.7299	31.3416
Ciclev10001934m	0	0	0	0	0	0
Ciclev10001935m	31.1419	24.9784	21.0793	18.4662	17.0204	18.6959
Ciclev10001938m	25.4779	33.0549	29.6588	29.3348	31.6731	27.8224
Ciclev10001939m	18.0938	13.0928	19.812	12.6447	15.3266	13.4367
Ciclev10001941m	112.472	185.929	120.715	70.6127	107.622	75.5925
Ciclev10001942m	107.719	171.201	117.781	51.9106	106.698	63.5753
Ciclev10001943m	1.37988	0.778116	3.86775	0.752955	0.520502	1.28262
Ciclev10001944m	0.199527	2.411	12.7513	0	0.0903157	5.30712
Ciclev10001946m	5.94185	6.27576	61.8078	22.0655	36.5583	316.183
Ciclev10001947m	7.60987	4.61576	5.85535	9.89262	7.42954	6.5294
Ciclev10001948m	0.135969	0	0	0.333873	0	0
Ciclev10001952m	2.16373	0.0836662	0	3.25867	0	0
Ciclev10001956m	0	0	0	0	0	0
Ciclev10001961m	35.703	33.9959	20.4151	43.5422	34.5305	45.1337
Ciclev10001964m	3.9356	2.94542	5.40892	3.01347	0.689593	2.39645
Ciclev10001965m	46.4503	26.1254	55.9854	55.9925	32.5899	46.4675
Ciclev10001966m	10.6823	12.1852	12.935	12.474	10.2509	13.8095
Ciclev10001967m	4.7283	9.97264	8.79535	2.28689	1.36199	0.922037
Ciclev10001968m	63.9229	21.5892	89.1717	124.041	38.2701	387.937
Ciclev10001970m	0.222915	0.107745	3.49901	2.46316	0.504512	21.1348
Ciclev10001973m	28.042	28.7214	34.8089	32.2426	28.2071	29.9801
Ciclev10001975m	1.19457	0.866081	0.223222	0.570357	0.0901201	1.53744
Ciclev10001976m	13.1429	10.41	14.3553	36.9918	26.0226	22.4809
Ciclev10001978m	217.742	191.828	140.221	142.054	170.287	94.8263
Ciclev10001979m	53.3275	31.1011	40.8483	78.6998	24.2052	121.512
Ciclev10001980m	5.65517	4.81077	7.48178	3.79558	3.9933	6.50199
Ciclev10001981m	0.289649	0.980001	0.974252	2.84494	1.04888	18.018
Ciclev10001982m	15.4853	9.39465	7.06452	15.2971	7.34782	6.231
Ciclev10001987m	17.1271	13.7183	17.9682	14.6193	13.4009	11.7563
Ciclev10001988m	7.36319	10.0063	18.186	10.656	14.4911	19.9604
Ciclev10001989m	5.09383	1.64138	0.126914	0.926512	2.25448	0.194248
Ciclev10001990m	60.8558	51.7083	58.9301	45.8303	40.138	59.9463
Ciclev10001991m	15.3837	14.3101	20.2854	23.441	21.9852	26.8141
Ciclev10001992m	1.97831	0.588433	0.341239	0.622788	0.275533	0.391713
Ciclev10001993m	0	0	0	0	0	0
Ciclev10001994m	1.17907	0.835851	0	22.7757	6.40449	1.28144
Ciclev10001996m	0	0	0	0	0	0
Ciclev10001997m	23.8266	22.1702	64.9341	14.097	15.7535	17.2278
Ciclev10001998m	0	0	0	0.0797521	0	0
Ciclev10001999m	52.8369	39.4827	54.1519	56.0708	57.3216	46.7256
Ciclev10002001m	2.80991	1.53924	0.630087	3.44987	0.67835	0.16073
Ciclev10002002m	21.5958	14.8089	15.7444	18.4599	19.8396	15.5174
Ciclev10002003m	6.72551	9.90701	16.9662	11.8616	14.3517	24.319
Ciclev10002005m	82.2359	61.3066	116.424	137.187	134.596	149.292
Ciclev10002007m	9.0029	8.95165	10.863	0	0	0
Ciclev10002008m	0	0.147679	0	0	0	0
Ciclev10002009m	21.2112	21.1806	12.9362	16.3121	18.1474	16.1996
Ciclev10002010m	283.112	495.814	1036.36	214.15	661.273	1227.39
Ciclev10002011m	66.2917	78.0895	105.203	69.9778	83.3323	73.8495
Ciclev10002020m	37.3566	38.7183	21.0858	28.6851	22.4879	13.2727
Ciclev10002021m	1.84738	2.63177	1.52619	1.19375	2.02452	0.834255
Ciclev10002023m	0.901131	2.50445	1.26292	1.65955	1.83553	1.44972
Ciclev10002024m	127.15	118.471	229.296	101.923	125.113	166.086
Ciclev10002025m	12.8986	11.2524	13.4035	10.3	13.2435	12.1469
Ciclev10002026m	0.49684	0.240144	0	2.43998	0.449789	1.59861
Ciclev10002028m	0	0	0	0	0	0
Ciclev10002029m	0.226145	0.364353	0.169034	1.1106	0.477701	0.258715
Ciclev10002031m	11.1842	7.84564	13.3164	6.31891	5.10734	6.87874
Ciclev10002035m	8.70887	8.01304	6.4703	10.6494	6.17432	4.86153
Ciclev10002036m	12.7742	11.7099	11.9352	13.9409	16.9479	17.8895
Ciclev10002041m	0.146207	0.565345	0.163925	0.718022	0	0.250896
Ciclev10002042m	0	0	0	0	0	0.134124
Ciclev10002047m	5.64519	6.92637	12.2935	4.88717	7.17448	9.4079
Ciclev10002048m	27.8632	23.2865	18.9182	23.3512	16.1799	12.4774
Ciclev10002050m	1.81114	1.96966	4.06125	2.03833	2.45943	1.74824
Ciclev10002052m	2.10694	1.40027	1.32878	4.31133	1.31135	1.01688
Ciclev10002053m	25.7092	27.5114	31.9084	13.213	21.1094	23.1875
Ciclev10002054m	2.60138	1.8106	0.933321	0.340677	0.094201	0.89281
Ciclev10002055m	0	0	0	0	0	0
Ciclev10002056m	43.7601	43.1336	37.8151	33.0023	33.6476	32.874
Ciclev10002058m	0	0	0	0	0	0
Ciclev10002059m	24.7602	21.1107	26.4676	35.4975	31.5347	37.805
Ciclev10002064m	12.9742	12.7929	16.68	11.1858	13.39	20.1862
Ciclev10002065m	0	0	0	0	0	0
Ciclev10002066m	4.75424	2.75752	3.95972	2.11245	1.10675	3.49647
Ciclev10002068m	3.6385	4.77347	2.4768	1.38269	0.470561	2.00693
Ciclev10002069m	0.132316	0	0	0	0.119785	0
Ciclev10002074m	0.124434	0.120289	0.139514	0	0.2253	0
Ciclev10002075m	2.18117	2.44144	1.67324	1.87925	1.45498	1.37899
Ciclev10002076m	1.98378	3.66106	1.1121	1.32851	1.22449	2.0116
Ciclev10002077m	8.84882	9.45018	11.8109	9.10519	11.5966	10.991
Ciclev10002078m	22.1392	4.48539	8.91815	18.555	93.3722	78.9407
Ciclev10002080m	73.4629	96.4647	112.932	50.2498	65.6581	115.083
Ciclev10002081m	46.8381	52.8525	53.2052	49.0743	50.9308	47.5153
Ciclev10002083m	42.7637	27.7881	21.5857	31.4438	34.6177	12.1799
Ciclev10002084m	0	0	0	0	0	0
Ciclev10002089m	9.08145	8.4369	15.6036	6.95051	11.8517	11.8399
Ciclev10002090m	12.558	12.7381	10.0146	10.4959	12.4896	8.49859
Ciclev10002092m	8.80782	8.43012	9.28856	7.63748	6.55266	9.87682
Ciclev10002098m	10.7444	11.1794	13.7017	18.6627	28.8837	15.6932
Ciclev10002099m	0.334373	0.215489	0	4.92632	1.51354	0.286897
Ciclev10002100m	55.9308	60.6785	105.427	78.8645	69.8706	159.476
Ciclev10002101m	16.7181	28.5315	18.8598	18.414	19.7128	16.4695
Ciclev10002103m	9.27901	4.71147	8.72212	5.2934	3.1395	8.84616
Ciclev10002104m	0	0	0	0	0	0
Ciclev10002106m	0	0.40185	0	0	0	0.237784
Ciclev10002108m	22.4406	18.5712	15.0403	23.3154	9.67045	11.7942
Ciclev10002109m	113.597	112.189	108.758	82.7505	99.8716	139.654
Ciclev10002110m	62.9381	61.8801	66.6506	52.4675	76.5108	86.649
Ciclev10002111m	3.06986	5.58607	3.13819	6.13391	6.04873	3.64111
Ciclev10002112m	0	0	0	0	0	0
Ciclev10002113m	60.5465	48.4123	28.7052	27.5397	33.8273	22.3385
Ciclev10002114m	35.8818	23.9652	14.7511	32.4842	24.6089	15.3003
Ciclev10002116m	22.3578	29.898	54.8346	33.3973	34.9148	57.7099
Ciclev10002117m	0.225099	0.544001	0.378566	1.10546	2.95484	1.06226
Ciclev10002119m	40.1244	10.5126	0.700731	22.0992	4.52643	0.965255
Ciclev10002120m	0.102128	0	0.343514	0.083592	0	0.0876277
Ciclev10002125m	0.129216	0	0	0	0	0
Ciclev10002126m	59.6207	49.8462	53.7478	39.1551	39.6604	35.7744
Ciclev10002129m	18.7507	11.3409	3.70995	5.49883	0.907755	0.258103
Ciclev10002130m	12.2086	12.4124	10.3841	25.2403	15.7211	22.6661
Ciclev10002132m	3.30415	3.92001	8.92463	7.25283	2.85528	11.34
Ciclev10002134m	23.842	22.2921	26.2931	19.8346	18.1342	22.3013
Ciclev10002135m	1.04377	0.275183	0.531938	0.232999	0.34361	0.325664
Ciclev10002136m	14.0274	23.211	20.8281	20.0667	14.9871	15.3971
Ciclev10002139m	31.8343	48.0772	38.1055	21.5127	23.2813	45.4915
Ciclev10002140m	12.6931	11.9529	16.8076	8.6876	11.6891	18.4018
Ciclev10002141m	0	0	0.940275	0.274572	0	0.863484
Ciclev10002142m	40.0129	55.4782	0	0.280719	0.206992	0
Ciclev10002145m	15.3814	15.1393	13.9531	11.903	10.3803	9.11825
Ciclev10002147m	22.7197	20.229	30.1655	26.2303	17.2123	40.219
Ciclev10002148m	25.3356	28.8855	40.2025	28.5223	28.499	36.0381
Ciclev10002149m	0	0	0	0	0	0
Ciclev10002150m	10.9134	11.1653	11.8281	9.45372	9.63292	11.5488
Ciclev10002151m	54.2838	43.3493	74.2034	38.7969	36.2341	64.0426
Ciclev10002153m	0.118042	0.11411	0.132347	1.25603	0.213727	0.101282
Ciclev10002154m	17.8108	22.0924	20.2098	16.5102	16.9983	18.7803
Ciclev10002155m	66.4393	74.5403	79.4965	54.071	54.7356	44.605
Ciclev10002156m	11.9267	17.5247	13.8	23.1946	12.3521	12.6893
Ciclev10002157m	0.150516	0	0	0	0	0
Ciclev10002160m	0.320635	0.103318	0	3.14928	0.387027	0.0917034
Ciclev10002163m	16.5695	18.6473	38.2641	13.967	19.3661	29.707
Ciclev10002164m	26.5861	12.356	5.92339	26.364	5.70853	0.292453
Ciclev10002166m	4.49935	6.44654	5.94543	1.2495	3.5641	4.27415
Ciclev10002167m	5.7984	3.98595	2.88937	6.53892	3.61617	7.29684
Ciclev10002169m	46.6335	12.74	2.50058	49.7864	17.8047	28.2696
Ciclev10002171m	8.85536	7.37143	9.10113	10.4695	5.67853	8.33674
Ciclev10002177m	14.1714	13.9554	10.84	6.07066	8.51293	4.65916
Ciclev10002178m	19.4113	14.9103	16.4698	15.8882	11.6837	17.1954
Ciclev10002179m	0	0	21.4343	1.45869	6.74683	112.876
Ciclev10002180m	63.1078	39.8231	49.3324	83.0048	69.3512	48.7328
Ciclev10002181m	0	0	0	0	0	0
Ciclev10002182m	28.4274	27.4804	13.7734	39.8878	16.4522	11.0632
Ciclev10002183m	0.901131	1.64543	2.91875	6.72014	4.26025	1.63228
Ciclev10002186m	78.4173	79.9474	113.023	75.3205	71.8639	79.6921
Ciclev10002190m	0.521259	0.881816	2.48382	1.49328	2.2415	2.68349
Ciclev10002192m	11.4139	11.2964	10.8674	5.5609	2.87028	6.91752
Ciclev10002193m	28.0003	24.1392	30.0167	13.1345	17.418	20.3016
Ciclev10002194m	139.609	132.336	188.149	101.662	147.894	168.278
Ciclev10002195m	14.5054	12.3562	14.2505	16.3396	12.9367	14.7256
Ciclev10002196m	1.82011	3.07908	1.40297	0.931099	1.85371	2.44013
Ciclev10002197m	0	0	0	0	0	0
Ciclev10002200m	50.7893	67.4124	78.4423	40.7303	48.666	92.2484
Ciclev10002201m	0	0	0	0	0	0
Ciclev10002202m	28.0626	32.7303	40.4693	32.6231	29.6393	42.1369
Ciclev10002204m	0	0	0	0	0	0
Ciclev10002205m	15.4624	15.2142	4.23086	9.34132	10.4152	1.89528
Ciclev10002208m	1.19759	0	0	0.857703	0	0
Ciclev10002209m	1.37324	0.265498	0	6.40678	1.74047	0.471304
Ciclev10002211m	16.8436	19.1713	19.6463	25.4606	25.947	29.6035
Ciclev10002214m	15.9657	16.8726	13.0461	16.3903	11.269	11.1448
Ciclev10002215m	13.851	20.0074	27.3105	7.03678	18.5927	28.6864
Ciclev10002216m	35.0408	38.9656	39.1589	38.335	38.1498	29.8691
Ciclev10002218m	0.467049	0.451491	0	1.2233	0.253692	0.240442
Ciclev10002220m	8.09529	5.62467	7.56361	11.2504	7.78671	7.48855
Ciclev10002221m	31.7149	33.4186	26.2971	30.299	28.8961	21.087
Ciclev10002223m	6.42786	5.58336	9.60911	6.40495	4.46977	9.11209
Ciclev10002226m	8.70777	5.28804	5.13185	11.2392	5.55862	5.2683
Ciclev10002227m	28.7426	19.4828	17.7178	26.1503	28.405	20.6333
Ciclev10002228m	1.65805	7.3976	14.0138	3.34059	7.85154	18.1659
Ciclev10002229m	8.27614	13.5462	14.3404	5.31146	6.72612	8.0694
Ciclev10002231m	14.9208	30.972	40.9796	14.9582	27.3297	65.2025
Ciclev10002233m	0	0	0	0	0.102141	0.484032
Ciclev10002237m	80.6689	47.648	4.04745	137.624	35.572	0.595656
Ciclev10002239m	22.561	4.95191	4.64355	35.9512	3.15741	8.04235
Ciclev10002241m	0.272207	0	0	0	0	0
Ciclev10002244m	14.9656	11.8896	10.3183	16.7549	19.2325	12.6932
Ciclev10002246m	55.4907	26.6835	33.5006	34.5884	64.1471	41.752
Ciclev10002251m	38.5217	26.5088	39.4079	40.1697	42.8533	36.2268
Ciclev10002254m	57.8374	51.9734	51.6032	50.3404	56.2319	57.3139
Ciclev10002259m	0	0	0	0	0	0
Ciclev10002260m	92.744	73.9418	90.3689	97.3539	95.7329	99.5109
Ciclev10002261m	20.2145	20.443	22.6642	11.8789	15.5786	14.9428
Ciclev10002263m	26.4516	23.7613	30.2168	39.3185	37.0495	43.3578
Ciclev10002265m	11.337	14.259	12.7109	3.79157	5.4076	8.9952
Ciclev10002266m	21.5069	22.4505	32.0898	20.6154	25.9849	30.9425
Ciclev10002267m	0	0	0	0	0	0
Ciclev10002268m	7.13305	3.40049	3.94396	3.35908	1.76919	1.34143
Ciclev10002270m	0	0.149753	0	0	0	0
Ciclev10002272m	4.58792	5.68601	11.2111	9.24362	6.07042	6.25805
Ciclev10002276m	19.1302	18.6023	0.380742	17.9743	21.3151	2.03961
Ciclev10002279m	6.62002	8.36201	5.73989	5.274	6.79218	5.37715
Ciclev10002280m	0.791723	0	0	0.925752	0.102392	0.0970446
Ciclev10002282m	0	0.171091	3.96871	0	0.160226	3.79645
Ciclev10002284m	10.87	4.49057	13.1248	15.2848	7.99026	6.45693
Ciclev10002288m	1.8682	0.180596	0.628379	4.58736	0.169128	1.92353
Ciclev10002290m	58.2577	35.9775	5.21593	58.9343	48.8162	2.63085
Ciclev10002292m	11.4755	19.5143	38.2227	29.6178	50.427	38.9533
Ciclev10002294m	1.87423	0.679423	30.0757	1.62994	0.106046	53.872
Ciclev10002295m	43.757	23.1533	27.0259	23.8768	28.2157	26.742
Ciclev10002297m	10.1603	8.90819	50.5999	80.1645	48.7714	189.56
Ciclev10002299m	0	0	0	0	0	0
Ciclev10002300m	2.07133	2.37777	1.45147	4.13251	4.10194	2.33262
Ciclev10002301m	6.69286	7.99916	16.5087	23.2073	8.042	2.50586
Ciclev10002302m	0.167933	1.29871	2.82426	2.40543	2.50849	1.00863
Ciclev10002303m	72.0232	64.0983	64.9857	44.0729	43.4684	43.258
Ciclev10002305m	3.15	4.91895	7.1993	2.77661	5.26466	4.78179
Ciclev10002306m	0.560004	0.541349	0	0.183346	0	0
Ciclev10002308m	4.67366	3.95323	5.89505	7.88988	8.72656	4.76197
Ciclev10002309m	15.5267	19.9493	31.1807	20.6716	24.1982	21.4166
Ciclev10002310m	0	0	0	0	0	0
Ciclev10002311m	36.2659	30.9131	39.2087	18.1319	24.9875	35.0638
Ciclev10002312m	12.5935	10.6523	5.00073	23.7295	9.50077	3.71438
Ciclev10002314m	0.124659	0	0.279532	0.102034	0.112854	4.38534
Ciclev10002321m	71.5796	60.3991	83.7518	64.7588	74.7643	77.3282
Ciclev10002322m	10.1219	9.33999	7.56571	12.8038	11.5236	7.36891
Ciclev10002323m	11.4568	7.95137	8.45366	7.85456	9.66263	4.36894
Ciclev10002326m	0	0.147761	0.514128	1.00088	0.138377	0.2623
Ciclev10002332m	94.9268	91.638	125.368	60.9793	90.6785	125.375
Ciclev10002333m	2.8778	2.78194	1.9066	0.535338	1.06579	0.112237
Ciclev10002336m	8.29651	18.9567	7.7798	8.88965	5.32586	6.21255
Ciclev10002337m	0.772831	0	0.346595	0.379538	0.279857	0.265241
Ciclev10002342m	14.2583	1.35372	0	23.7577	0.461002	0
Ciclev10002343m	0	0.643866	0.186692	0.136291	0.150744	0.285742
Ciclev10002344m	102.06	120.118	156.377	68.8333	85.7659	118.788
Ciclev10002345m	23.2196	28.332	26.2649	21.0325	19.8062	28.1576
Ciclev10002346m	157.312	151.376	239.608	165.984	202.053	216.209
Ciclev10002348m	0	0	0	0	0.340099	0
Ciclev10002349m	966.254	1560.3	2099.71	1464.97	1701.39	2784.72
Ciclev10002350m	6.87401	13.29	5.72523	5.14412	5.68963	6.23504
Ciclev10002351m	41.1434	40.8288	37.9649	39.6363	41.8618	38.0093
Ciclev10002352m	6.03244	4.37362	3.9157	2.92355	4.31144	3.20091
Ciclev10002354m	86.1842	108.139	103.461	68.3152	101.764	96.8227
Ciclev10002355m	1.19629	0.674592	0	0.163195	0	0.171074
Ciclev10002356m	121.532	111.701	67.2306	135.897	127.326	109.785
Ciclev10002359m	11.686	14.4059	25.9639	22.0258	26.4968	54.7332
Ciclev10002360m	37.3936	46.1071	61.8895	17.2813	29.1315	32.3026
Ciclev10002361m	30.2453	30.8928	25.209	31.2951	31.3074	18.5084
Ciclev10002362m	1.16644	14.433	34.7873	0	0	1.00082
Ciclev10002365m	24.7236	24.0077	18.4798	15.3139	20.9708	19.3977
Ciclev10002366m	41.0267	38.2077	30.9681	41.4316	50.1148	23.9966
Ciclev10002367m	13.8111	16.8039	19.356	10.0375	14.5511	19.0011
Ciclev10002369m	22.647	13.7129	9.48694	21.6939	20.0517	13.4526
Ciclev10002374m	11.1709	14.209	16.1503	12.9131	14.2825	17.8245
Ciclev10002376m	5.96361	7.82386	4.29835	3.95146	3.72778	3.89857
Ciclev10002377m	17.0882	21.3412	22.967	18.2435	18.7369	33.3309
Ciclev10002378m	17.5683	22.521	24.693	14.5881	11.8708	12.9985
Ciclev10002383m	0	0.452821	0	1.15022	0	0
Ciclev10002384m	0	0	0	0	0	0
Ciclev10002385m	0.774567	4.77338	3.58229	0.39624	0	0.332296
Ciclev10002388m	0	0	0	0.108405	0	0
Ciclev10002389m	30.5143	28.0021	30.6464	23.3578	25.6014	22.1254
Ciclev10002390m	5.30939	4.63583	7.297	3.50463	3.56618	4.4086
Ciclev10002391m	41.5329	20.8038	7.7798	55.3957	20.9393	9.05997
Ciclev10002392m	1.03522	0.636834	0.738614	1.15545	0.511193	0.888239
Ciclev10002394m	47.5015	34.3613	49.5143	51.4874	57.8251	63.5848
Ciclev10002395m	127.001	364.649	272.226	69.9746	202.957	859.74
Ciclev10002396m	7.69248	9.4383	8.45885	24.0955	11.5174	11.9313
Ciclev10002397m	9.45199	7.91884	4.52157	8.56168	5.24822	4.00092
Ciclev10002398m	0.584208	10.9184	0	0.478174	1.93924	2.17213
Ciclev10002399m	0	0.2634	5.34619	3.34533	0.98669	6.5461
Ciclev10002401m	24.2955	16.8581	14.7061	15.1279	16.1924	12.4052
Ciclev10002404m	0	0	0	0.758225	0	0
Ciclev10002405m	0	0.290371	3.19939	0	0	0
Ciclev10002406m	40.6838	60.4244	142.522	47.8445	42.899	89.0741
Ciclev10002407m	0.505029	0.325471	0	0	0	0
Ciclev10002409m	3.87595	10.3038	5.27687	2.94586	2.63167	4.98844
Ciclev10002410m	4.93663	1.87479	0	3.75202	1.91534	0.151275
Ciclev10002412m	0	0	0	0	0	0
Ciclev10002413m	79.3814	62.5265	94.0326	61.8074	86.8531	78.3338
Ciclev10002415m	7.9876	7.2739	4.02353	14.5917	9.43196	9.43598
Ciclev10002416m	14.2067	6.27816	6.52306	36.9888	21.5581	8.12641
Ciclev10002417m	8.85744	8.11173	7.70946	3.24334	3.05974	8.29981
Ciclev10002418m	266.947	327.114	216.034	154.672	340.029	126.332
Ciclev10002419m	13.0069	15.7443	21.3041	17.3116	21.2976	17.7592
Ciclev10002420m	0	0	0	0	0	0
Ciclev10002422m	0	0	0	0	0	0
Ciclev10002423m	0	0	0	0	0.140243	0.132918
Ciclev10002424m	48.3182	38.9358	51.6098	44.3789	38.667	42.6605
Ciclev10002425m	37.9247	9.93104	1.18412	78.0357	14.5155	1.15332
Ciclev10002428m	8.64795	7.64331	4.98649	8.79738	5.48029	3.60404
Ciclev10002429m	2.44167	3.77653	0.730018	5.46259	0.884177	2.09499
Ciclev10002430m	2.08898	1.70872	4.50412	9.46986	7.1282	11.3058
Ciclev10002431m	0	0.141637	0	0.479699	0	0
Ciclev10002432m	7.03586	15.0501	16.6162	2.9407	9.21554	6.67911
Ciclev10002433m	59.7612	46.4675	8.37543	55.2948	21.0232	3.48343
Ciclev10002435m	0.177443	0	0	0.145237	0	0
Ciclev10002438m	107.062	57.0126	2.44259	17.1949	13.665	0
Ciclev10002439m	0	0	0	0	0	0
Ciclev10002442m	160.852	79.2419	88.0254	106.64	113.948	89.9237
Ciclev10002443m	65.2049	66.8299	37.8746	36.9734	45.5171	23.0865
Ciclev10002444m	54.4376	41.3598	60.0374	60.9386	69.0113	61.9725
Ciclev10002449m	10.7756	9.6154	8.20923	9.95063	11.7562	11.4978
Ciclev10002450m	98.4299	97.3266	54.9799	80.4681	70.6649	49.1889
Ciclev10002453m	79.0726	117.582	99.6032	92.5207	106.656	132.777
Ciclev10002455m	1.46543	1.88882	0.547675	1.49932	2.32165	1.04781
Ciclev10002461m	65.1513	49.4534	57.8715	57.9267	60.3313	52.5547
Ciclev10002462m	0	0	0	0	0	0
Ciclev10002463m	116.519	122.541	103.792	80.3179	82.1307	70.7454
Ciclev10002464m	2.05973	7.96446	23.5264	1.26442	3.49626	22.8642
Ciclev10002467m	12.0965	12.2251	19.5731	5.62558	11.5732	9.08165
Ciclev10002470m	25.2525	52.0494	54.1848	39.4378	37.4449	67.9898
Ciclev10002471m	0	0.1789	0.829967	0	0	0.158788
Ciclev10002472m	0.610057	1.76921	0.512991	0.374499	0.276142	0.13086
Ciclev10002473m	36.2961	27.2619	49.0386	34.731	49.4065	65.422
Ciclev10002474m	0	0	0	0	0	0
Ciclev10002475m	18.5932	33.6628	78.2623	24.1175	29.528	98.0178
Ciclev10002476m	0	0	0	0.484851	0	0
Ciclev10002477m	14.474	14.911	15.5174	14.9601	15.7814	16.7701
Ciclev10002478m	7.61541	6.59259	3.82311	8.00085	4.83625	5.949
Ciclev10002480m	45.7807	68.3718	55.3457	60.389	64.1501	61.5966
Ciclev10002483m	5.70615	8.49773	6.91639	4.41803	6.2827	8.73336
Ciclev10002484m	10.2183	10.88	9.96227	5.45458	8.98248	6.60737
Ciclev10002486m	5.09055	1.14976	3.20044	2.84265	2.49805	2.77578
Ciclev10002493m	105.712	89.4053	134.845	88.9398	105.952	95.0297
Ciclev10002494m	45.1817	48.4841	53.623	32.6509	37.9334	51.6586
Ciclev10002495m	13.4091	14.6243	22.1656	12.5232	12.6061	19.0279
Ciclev10002498m	28.5214	17.3893	14.9937	27.51	13.3923	14.7237
Ciclev10002499m	19.7154	21.0168	26.3439	19.3424	17.6039	25.1425
Ciclev10002503m	0.222018	0.858487	0.248923	2.18066	0.200992	0.190495
Ciclev10002504m	3.99632	0.214622	0	0.908609	1.20595	0
Ciclev10002505m	0.762256	1.01319	0.747802	1.09184	1.0351	0.327014
Ciclev10002509m	5.07953	5.05062	1.78989	2.85093	2.36494	7.47141
Ciclev10002511m	27.8616	22.1941	25.6071	28.4814	27.9294	25.2395
Ciclev10002513m	77.5128	77.3445	66.9446	54.3809	62.3099	40.8918
Ciclev10002515m	18.9892	16.1316	19.3549	17.8976	19.0663	18.3667
Ciclev10002520m	49.3707	48.4121	36.0311	41.6546	40.29	40.7082
Ciclev10002522m	2.52427	1.04579	3.09971	3.34514	3.48223	4.84741
Ciclev10002523m	8.50515	17.7418	27.1019	12.2742	16.4125	172.357
Ciclev10002525m	40.4282	33.4734	43.1933	48.3745	50.7964	47.4434
Ciclev10002528m	24.7047	24.3108	37.816	29.0599	27.5882	38.967
Ciclev10002529m	5.17743	9.26844	32.4642	13.0271	9.02705	43.436
Ciclev10002531m	64.398	64.3871	91.5935	71.5849	50.4151	58.4119
Ciclev10002532m	19.4455	20.6351	29.3426	15.6768	12.1772	31.9892
Ciclev10002536m	75.4518	91.2238	277.94	44.7268	123.199	256.702
Ciclev10002538m	0.78115	0.188782	0	0.479529	0.176794	0
Ciclev10002540m	128.838	64.8455	29.5564	120.042	107.338	10.7253
Ciclev10002541m	1.5451	0.659975	0.443157	1.70583	0.94336	0.184984
Ciclev10002542m	20.1733	21.3093	23.6665	18.1521	28.9061	30.0328
Ciclev10002547m	0.168549	0	0.188975	0	0	0
Ciclev10002548m	30.6715	19.2868	24.5394	25.8359	28.98	34.6205
Ciclev10002549m	12.185	9.36764	13.0162	10.8373	9.20705	15.065
Ciclev10002550m	10.0011	11.2793	12.4146	3.31336	5.49709	11.8502
Ciclev10002551m	129.452	86.9901	112.495	123.395	79.9963	94.3593
Ciclev10002552m	6.39018	6.55169	5.86193	10.4607	9.64171	8.63969
Ciclev10002554m	14.8903	15.8603	18.086	29.905	28.8326	27.445
Ciclev10002557m	99.2541	88.6209	86.1932	12.5552	1.1436	0.464518
Ciclev10002560m	7.12602	4.04333	2.77899	9.00257	5.32924	3.98755
Ciclev10002562m	6.11259	5.90897	5.63498	8.44979	8.85397	11.3053
Ciclev10002564m	0.192024	0.371254	0.430588	0	0.173839	0
Ciclev10002565m	28.1006	23.0163	25.9187	21.4142	21.0534	25.061
Ciclev10002566m	79.9301	69.0156	161.542	84.2664	93.905	129.617
Ciclev10002567m	72.0157	36.6915	16.0641	42.7942	18.091	6.03888
Ciclev10002569m	1.29216	0.124911	0	0.740341	0.116979	0
Ciclev10002572m	13.4338	14.3533	22.3548	12.7317	10.8814	18.3209
Ciclev10002573m	34.8738	53.3121	45.0104	40.3823	47.3568	30.5022
Ciclev10002574m	8.55026	7.6197	8.53792	12.0285	6.77298	3.66813
Ciclev10002575m	25.4695	27.7615	22.8739	29.6748	28.3513	22.1877
Ciclev10002580m	10.3328	8.34865	6.05184	9.08852	7.12039	8.86568
Ciclev10002584m	4.87654	1.49994	0.745569	20.683	3.61205	0.570566
Ciclev10002585m	22.7382	16.7472	28.1915	18.1189	18.1888	24.6711
Ciclev10002586m	23.4764	21.7761	28.4515	26.213	29.7299	23.054
Ciclev10002589m	0.168343	0.244103	0.094372	1.44678	0.0762004	0.938868
Ciclev10002591m	16.2986	38.4246	0.372934	21.0997	7.07644	2.85398
Ciclev10002594m	17.4054	20.5352	28.7343	18.2847	27.2958	25.5174
Ciclev10002596m	143.891	43.4572	8.13586	31.2907	16.0226	0
Ciclev10002597m	297.072	283.46	250.917	289.328	294.194	294.892
Ciclev10002598m	33.1611	32.4555	40.2652	32.3231	41.2317	35.5364
Ciclev10002599m	133.633	185.698	135.421	53.8479	70.0274	58.9833
Ciclev10002600m	33.44	42.6981	40.9009	29.7126	28.4924	35.75
Ciclev10002601m	16.3436	15.1915	46.5153	20.4089	11.3814	23.192
Ciclev10002602m	8.77936	19.7231	22.1821	5.36413	21.1572	14.323
Ciclev10002603m	6.75508	4.85568	2.33037	6.80498	2.03846	5.0529
Ciclev10002604m	29.0083	7.41341	0	23.6069	2.11297	0
Ciclev10002605m	29.2683	30.0168	80.1224	18.2407	30.8006	87.9581
Ciclev10002608m	41.4755	31.6724	36.5219	18.834	19.4597	28.4369
Ciclev10002610m	21.1112	43.3306	116.216	7.5342	11.8657	126.453
Ciclev10002611m	26.4042	31.5954	76.3305	39.7192	46.1278	91.9682
Ciclev10002613m	0	0	0	0.170984	0.189116	0.358477
Ciclev10002616m	16.2204	13.0667	13.0155	21.7368	10.2214	11.8707
Ciclev10002618m	0.379467	0.122275	0.709088	0.621188	0.229021	0.542648
Ciclev10002619m	0	0	0	0	0	0
Ciclev10002620m	0.876311	1.41187	3.60253	0.956349	3.56996	1.62909
Ciclev10002621m	0	0	0	0	0	0
Ciclev10002622m	22.3104	21.3248	35.9753	25.8527	21.8996	47.2114
Ciclev10002623m	0.166513	0	0	0.136291	0	0
Ciclev10002624m	64.5274	61.16	100.752	49.7224	66.9066	109.77
Ciclev10002625m	11.1789	7.36807	6.83652	6.51586	7.36018	4.50518
Ciclev10002626m	48.8586	54.6109	54.9508	43.74	34.8325	38.1224
Ciclev10002627m	31.9101	20.9552	8.75558	27.9919	24.2563	14.4406
Ciclev10002629m	15.7963	23.1276	26.48	14.4357	19.2986	24.4753
Ciclev10002632m	91.5249	60.9789	57.4052	1.78039	0.302952	0.574259
Ciclev10002634m	21.2112	21.9885	34.4209	31.182	26.2771	31.0111
Ciclev10002637m	38.8684	26.9396	25.0783	27.9122	25.8927	27.372
Ciclev10002638m	0	0	0	0	0	0
Ciclev10002639m	74.4973	48.8068	64.5243	79.1823	70.1592	99.8181
Ciclev10002644m	354.915	849.271	307.653	340.201	430.397	122.225
Ciclev10002646m	44.5508	55.8507	28.3925	31.8588	42.7942	24.5447
Ciclev10002648m	0	0	0.223707	0.163313	0	0.342395
Ciclev10002649m	2.3742	1.31149	5.1337	3.19254	2.76346	4.80174
Ciclev10002650m	0.19668	0	0	0	0	0
Ciclev10002653m	17.9285	23.5559	25.1973	17.5681	17.2594	26.1077
Ciclev10002654m	0	0	0	0	0	0
Ciclev10002655m	9.23257	4.06584	5.0607	4.78601	4.27199	3.2567
Ciclev10002660m	10.221	12.4581	9.21758	8.91154	5.83348	4.95686
Ciclev10002661m	19.1439	17.6165	11.7639	18.8333	22.1636	7.10732
Ciclev10002663m	0	2.30456	2.2274	0	0	0
Ciclev10002666m	174.26	107.187	95.6861	106.784	103.734	74.7022
Ciclev10002668m	10.9508	4.85917	11.4728	16.6041	12.6767	9.08795
Ciclev10002669m	168.046	311.365	192.169	126.638	185.897	125.561
Ciclev10002670m	0	0	0	0.422129	0	0.147503
Ciclev10002671m	23.7261	24.3805	17.1757	8.25726	8.96377	10.5794
Ciclev10002672m	61.7654	16.2932	2.11273	44.2143	3.98047	4.2217
Ciclev10002675m	0.632445	0	0	0	0	0.406986
Ciclev10002676m	69.874	96.3049	135.241	86.2483	81.1363	144.466
Ciclev10002678m	26.9868	24.2797	25.1644	21.6513	26.6081	14.214
Ciclev10002679m	3.44273	4.43739	11.9474	3.62298	1.33573	0.421988
Ciclev10002683m	0.430853	4.44267	6.76293	54.4262	8.97117	3.82002
Ciclev10002684m	3.21667	1.50114	2.11414	2.36048	4.41828	1.6179
Ciclev10002686m	19.4829	13.7457	4.66827	21.0909	12.5172	2.35921
Ciclev10002687m	93.6846	30.53	6.54627	135.767	32.3153	1.36628
Ciclev10002689m	640.529	577.451	566.742	297.478	433.757	421.961
Ciclev10002690m	28.2864	35.312	22.6831	40.0185	36.2917	27.1634
Ciclev10002691m	7.86524	8.34865	10.2017	10.0984	5.30539	10.9829
Ciclev10002692m	167.639	160.337	123.698	90.9096	80.4402	56.2897
Ciclev10002693m	12.922	2.78829	0.129357	2.54973	1.56673	0
Ciclev10002694m	1.05347	0.763783	3.39577	0	1.7882	5.64935
Ciclev10002695m	0	0	0	0	0	0
Ciclev10002696m	25.4861	33.8761	50.6011	49.1089	39.4157	32.1939
Ciclev10002698m	52.1253	28.8229	7.34972	77.6271	16.0806	0.453594
Ciclev10002699m	3.18046	3.53569	4.81395	1.56193	2.73531	4.77556
Ciclev10002700m	20.737	21.6716	23.4071	18.6935	22.8323	16.9511
Ciclev10002701m	45.721	41.7273	40.5955	21.3844	32.3931	16.9344
Ciclev10002702m	1.22554	1.18471	0.687028	0.401242	0	0.210306
Ciclev10002703m	2.41113	0.635677	0	2.15293	0	0
Ciclev10002705m	39.9304	36.2697	42.0664	15.7866	17.8699	33.8731
Ciclev10002706m	0.553151	1.47049	2.17065	0.90551	0.250384	1.06788
Ciclev10002707m	0	0	0	0	0	0
Ciclev10002708m	10.9585	15.0279	15.7153	23.7797	30.4543	31.0503
Ciclev10002709m	0.275196	0	0.308545	0	0	0
Ciclev10002710m	74.9707	91.0335	123.624	68.9966	83.1833	114.375
Ciclev10002713m	51.8926	44.3777	47.4322	43.7197	46.2895	42.9579
Ciclev10002714m	755.664	737.677	367.635	779.052	505.56	207.792
Ciclev10002716m	6.86581	0.538143	0	6.37909	4.36773	8.12001
Ciclev10002717m	30.2958	24.727	16.8819	20.0456	21.3502	13.5419
Ciclev10002719m	85.5889	74.3582	72.6358	69.4571	57.2453	71.4012
Ciclev10002721m	18.8446	17.6592	31.6924	20.7756	18.1045	30.853
Ciclev10002722m	0	0	0	0	0	0
Ciclev10002723m	0.902605	1.09067	4.04795	0	0	0.968063
Ciclev10002724m	0.0671241	0.129776	0.225776	0.164824	0.364605	0.518343
Ciclev10002725m	8.26647	12.1294	16.385	43.8589	38.7545	54.0824
Ciclev10002726m	2.75379	1.7747	0.720419	1.27725	1.4127	1.73272
Ciclev10002727m	0.349488	2.02707	0.587761	0.572112	1.26556	0.4498
Ciclev10002729m	4.26411	5.10351	0.682981	9.97194	6.43383	3.48446
Ciclev10002730m	39.7159	32.2617	40.804	38.564	43.7472	47.6817
Ciclev10002731m	263.298	173.022	113.062	389.15	384.582	53.7634
Ciclev10002732m	1.41606	5.8489	28.7224	6.95429	9.55643	12.4814
Ciclev10002733m	9.95261	47.4451	26.584	22.0427	69.4307	45.7115
Ciclev10002734m	1.89908	0.367163	0.212922	1.86528	0	0
Ciclev10002735m	815.274	744.194	553.65	648.883	736.906	577.188
Ciclev10002737m	55.0638	57.3559	64.1297	55.2891	53.3271	74.2563
Ciclev10002738m	3.14188	3.39454	2.90099	1.51272	1.33851	1.2686
Ciclev10002739m	1.21608	0.881677	0.852157	3.35935	2.06422	1.4347
Ciclev10002740m	0	0	0.218954	0	0	0
Ciclev10002741m	93.2695	71.9697	74.1767	74.0339	75.5052	60.7492
Ciclev10002743m	514.095	579.503	776.229	430.028	255.509	682.904
Ciclev10002744m	6.41948	9.02638	7.52459	4.65727	7.39652	6.50948
Ciclev10002746m	91.107	71.5516	157.559	157.743	137.361	131.177
Ciclev10002747m	169.672	241.206	278.975	273.574	325.279	121.683
Ciclev10002748m	29.8208	26.7684	30.6123	28.5293	39.9693	23.593
Ciclev10002749m	75.2947	220.947	167.713	88.4716	94.2181	56.7081
Ciclev10002751m	465.734	468.949	496.916	396.939	437.265	483.627
Ciclev10002752m	15.7236	10.9777	3.42788	10.9632	5.00847	1.87377
Ciclev10002753m	0	0.649514	0.602656	0.549947	0	0.691797
Ciclev10002755m	0.124659	0.120506	0.419298	0.306101	0	0.427838
Ciclev10002756m	433.577	373.977	323.556	267.023	242.601	177.076
Ciclev10002758m	0	2.27829	7.59694	0	2.93372	32.6076
Ciclev10002759m	27.9523	34.8719	34.5161	43.7484	38.4708	61.0933
Ciclev10002760m	53.9437	51.8555	79.0645	42.4264	42.9696	35.6831
Ciclev10002761m	6.05481	2.07298	0.141428	10.015	4.79624	0.865854
Ciclev10002762m	1.12641	4.35556	18.9438	8.48213	5.71055	11.9844
Ciclev10002763m	61.5331	70.8638	52.9332	61.0935	52.1899	59.6693
Ciclev10002764m	555.879	713.352	997.225	417.67	651.882	546.722
Ciclev10002766m	362.55	204.68	144.486	126.437	150.416	121.194
Ciclev10002768m	0.343395	1.16184	0.192505	1.68641	0.155438	0.147319
Ciclev10002769m	6.52808	5.80577	8.63664	1.70984	3.07313	5.37715
Ciclev10002770m	86.8531	100.455	95.4654	79.3296	77.8557	66.7619
Ciclev10002774m	0	0	0	0	0	0
Ciclev10002776m	4.10515	3.19408	6.06201	4.83522	3.17253	13.9173
Ciclev10002778m	112.022	96.9165	67.2577	94.1314	72.7595	43.3662
Ciclev10002780m	0	0	0	0	0	0
Ciclev10002782m	924.779	669.407	857.866	900.03	948.266	665.194
Ciclev10002788m	93.9214	97.1394	105.917	73.143	42.2658	53.6719
Ciclev10002791m	69.8991	98.4928	54.7925	60.364	77.7588	40.1525
Ciclev10002793m	200.557	96.5457	81.0232	218.787	69.5384	14.7697
Ciclev10002794m	0	0	0	0.171503	0	0
Ciclev10002795m	4.32785	0.996115	0.231063	5.73523	2.98514	0.176827
Ciclev10002796m	25.4601	2.29434	0	7.59392	0.976653	0
Ciclev10002797m	19.5378	16.3419	41.4806	31.4163	28.3502	52.1935
Ciclev10002801m	47.1644	32.3236	37.4332	22.3064	20.302	20.7516
Ciclev10002802m	7.30453	4.70747	4.09487	12.2066	6.33725	4.9617
Ciclev10002803m	0.720339	1.39269	14.2144	12.1457	5.99953	16.8113
Ciclev10002804m	100.1	76.5413	80.6299	97.3904	80.6242	73.297
Ciclev10002805m	12.7504	280.241	477.725	5.16079	185.956	388.554
Ciclev10002808m	22.5018	28.0489	20.9133	23.83	25.5529	21.932
Ciclev10002811m	4.57608	0.285397	0	0.604118	0	0
Ciclev10002812m	15.3771	2.77142	9.35085	18.7726	3.77516	0.670873
Ciclev10002813m	291.134	96.3901	17.9425	115.704	38.6336	89.9553
Ciclev10002814m	48.3765	53.5999	70.928	64.7246	62.1555	81.4192
Ciclev10002815m	64.6137	83.1352	102.544	71.7567	67.6947	101.9
Ciclev10002816m	0	0	0	0	0	0.146046
Ciclev10002817m	231.324	158.047	117.176	182.098	133.66	151.984
Ciclev10002818m	39.6592	31.7143	47.9574	25.663	33.0838	47.0339
Ciclev10002819m	1256.45	2013.09	1610.43	851.889	1259.11	697.458
Ciclev10002820m	37.2106	1.24755	0	48.2382	0.973606	0
Ciclev10002822m	0	0	0	0	0	0
Ciclev10002824m	88.3387	46.3213	44.6605	46.439	42.8474	32.412
Ciclev10002826m	64.3131	67.3739	80.1533	74.1032	79.5876	89.6407
Ciclev10002827m	0.287235	0.277667	0	0.235102	0.520068	0
Ciclev10002829m	0	0	0	0	0	0
Ciclev10002830m	50.2831	37.2044	34.0575	47.0708	31.5044	32.2629
Ciclev10002831m	34.7314	38.6614	36.9736	0	0	0
Ciclev10002832m	2.22652	1.65565	0.192026	0	0.155051	0.146953
Ciclev10002833m	27.5196	26.8689	31.3174	49.7798	35.6262	36.3629
Ciclev10002835m	0	0.306215	0.177578	0.259274	0.501846	0.611531
Ciclev10002836m	26.1657	13.6199	3.61066	20.5929	11.4795	4.31742
Ciclev10002837m	16.2125	11.5276	11.5673	7.56715	9.0974	12.9909
Ciclev10002838m	23.0034	33.9259	24.7991	37.0532	48.1911	43.7763
Ciclev10002840m	93.2851	1.98629	0	92.8357	10.2308	0
Ciclev10002841m	72.6889	112.967	72.1219	62.304	101.911	35.3236
Ciclev10002842m	20.9732	13.9595	14.2631	19.5586	19.2983	22.4204
Ciclev10002843m	252.331	536.747	360.775	168.483	323.411	98.0122
Ciclev10002844m	45.6147	51.0576	60.7558	45.1958	54.3355	61.7971
Ciclev10002848m	5.35622	7.09549	6.45015	3.40983	5.56735	6.80848
Ciclev10002849m	0	0	0	0	0	0
Ciclev10002850m	0.643264	2.69462	18.5113	10.1792	6.01758	14.5342
Ciclev10002852m	0	0.355414	0	0.902793	0	0
Ciclev10002853m	83.6053	72.8314	52.814	63.8088	50.6248	50.108
Ciclev10002854m	38.5751	46.0809	92.7488	53.7834	54.1756	70.0975
Ciclev10002858m	63.2724	49.9467	38.413	74.8559	97.5518	63.7715
Ciclev10002859m	7.69097	17.1204	41.8493	10.511	21.9738	91.9619
Ciclev10002862m	0	0	0	26.3938	16.6652	21.1323
Ciclev10002863m	386.41	339.187	232.213	343.7	263.236	220.74
Ciclev10002865m	35.3571	27.3053	36.9843	25.868	27.5383	38.6415
Ciclev10002868m	49.6446	52.7153	34.6077	48.2135	49.6005	33.1056
Ciclev10002869m	25.2867	19.9338	3.88141	76.8754	15.2614	0
Ciclev10002870m	357.245	363.306	497.122	199.603	257.087	661.233
Ciclev10002871m	0	0	0	0	0	0
Ciclev10002873m	4.05509	3.26667	3.03101	4.14887	4.89476	2.6095
Ciclev10002874m	50.2319	64.8206	87.5785	68.5568	94.8902	103.561
Ciclev10002876m	0	0	0	0	0	0
Ciclev10002879m	7.37289	5.55928	2.14926	8.93138	8.81056	6.83215
Ciclev10002881m	0.307752	0	0	0	0	0
Ciclev10002882m	4.01911	4.89876	2.74289	5.14901	5.69504	1.7992
Ciclev10002883m	80.6354	81.314	84.9872	72.3311	65.4717	70.0161
Ciclev10002884m	30.5718	32.7406	21.843	13.7382	9.22555	3.60035
Ciclev10002885m	6.04577	4.41892	4.1883	0.120694	0.177991	0.0421737
Ciclev10002887m	1.16842	1.88249	4.3667	1.59391	1.41035	2.00504
Ciclev10002888m	0.217465	0.420442	0.243819	0.177996	0	0.373178
Ciclev10002890m	0.673866	0.390851	0.906635	3.97123	1.83015	0.462551
Ciclev10002893m	0.620118	0.399641	0.463512	0	0	0
Ciclev10002895m	40.6077	51.5923	58.1035	59.9857	49.3663	40.981
Ciclev10002897m	6.00348	2.20132	0	22.5359	0.749648	0.355247
Ciclev10002898m	4.20986	2.44177	0	4.99638	0.762237	0
Ciclev10002899m	262.103	246.578	214.374	125.031	171.973	170.618
Ciclev10002900m	52.5449	6.36783	0	156.61	26.0727	0
Ciclev10002903m	0.304355	0	0	0.249115	1.37766	0
Ciclev10002904m	0	0	0	0	0	0
Ciclev10002905m	0	0	0	0	0	0.259994
Ciclev10002906m	141.189	11.8096	0	615.099	192.28	0.149743
Ciclev10002907m	33.1425	54.2519	43.3521	39.7866	41.4054	21.0433
Ciclev10002908m	29.4836	46.7506	44.234	38.7159	55.3032	46.045
Ciclev10002910m	57.3261	71.3166	87.3249	89.4874	58.2476	91.7323
Ciclev10002911m	36.3969	47.0401	70.7481	39.0196	39.755	79.4306
Ciclev10002912m	16.1644	34.0094	17.0572	33.6602	37.2297	37.3248
Ciclev10002914m	35.2782	46.1087	57.9175	47.4379	38.944	36.4467
Ciclev10002915m	29.6124	34.0126	52.4791	22.9347	38.4826	49.5865
Ciclev10002916m	35.3597	61.757	81.2884	43.7777	63.7532	52.7749
Ciclev10002917m	74.9684	76.3029	86.952	60.3743	61.004	95.8208
Ciclev10002919m	1.04846	0.675692	1.37144	4.14782	3.79669	0.4498
Ciclev10002920m	5.20275	6.70592	7.77767	0.354872	0.392504	0
Ciclev10002921m	1.9661	3.32607	5.23537	0.201157	0.667467	0.210869
Ciclev10002922m	0	0	0	0	0	0
Ciclev10002923m	61.7342	55.88	61.8745	36.2894	38.7828	43.0172
Ciclev10002924m	3.21632	1.24367	0.961625	4.91412	1.16469	0.367954
Ciclev10002925m	25.2767	13.4761	7.55731	14.4196	7.21161	9.06946
Ciclev10002926m	4.2206	7.93334	8.67548	3.07073	5.73136	0.603558
Ciclev10002927m	25.1975	134.889	272.649	80.551	244.683	866.834
Ciclev10002928m	39.9106	64.0096	87.3152	51.3336	16.0713	23.9041
Ciclev10002929m	4.46739	2.82941	5.1815	0.252177	0.976217	0.132176
Ciclev10002930m	0	0	0	0	0	0
Ciclev10002933m	18.6669	18.6782	11.2601	12.5984	20.951	21.73
Ciclev10002934m	3.56953	0.431327	0	1.46083	0.807873	0
Ciclev10002935m	2.6514	1.21409	3.75501	3.08393	7.70627	4.31043
Ciclev10002937m	61.9859	46.4828	81.762	79.6473	66.6375	138.437
Ciclev10002938m	5.76367	7.0379	7.31243	17.753	10.2984	13.1441
Ciclev10002941m	3.17355	3.06783	40.7209	29.1503	14.6843	54.1566
Ciclev10002943m	0.894386	0.532057	0.694227	0.844679	0.68512	1.82995
Ciclev10002944m	9.10721	1.71186	0	5.59069	3.43531	0
Ciclev10002945m	69.9029	105.41	128.216	71.0581	111.401	163.073
Ciclev10002946m	22.8399	26.1081	26.7293	32.8859	26.4122	11.0144
Ciclev10002947m	49.3275	50.7172	134.257	75.7559	80.9491	323.187
Ciclev10002948m	2.30557	0.445753	0	0.377422	0	0
Ciclev10002949m	214.004	309.168	104.552	32.7963	145.097	91.4187
Ciclev10002950m	153.966	117.275	115.719	114.242	131.961	121.484
Ciclev10002952m	24.1123	24.5044	33.533	16.7629	23.7879	29.3091
Ciclev10002953m	38.6838	54.0792	45.1511	22.7322	7.36326	15.1489
Ciclev10002954m	710.842	701.621	895.668	611.489	700.464	1013.51
Ciclev10002955m	29.4574	16.342	14.641	26.348	22.7272	11.8124
Ciclev10002956m	0	0	0	0	0	0
Ciclev10002958m	25.4019	17.7604	18.8077	11.3765	14.4631	14.256
Ciclev10002960m	47.6129	57.3218	58.9505	37.2976	52.0949	53.6348
Ciclev10002961m	0.947581	2.51904	2.92164	0	0.857844	3.65868
Ciclev10002962m	0.306384	0.296178	2.06108	3.26009	3.05107	0.262883
Ciclev10002963m	6.30433	8.47906	8.2976	0	0	0
Ciclev10002964m	0	0	0	0	0	0
Ciclev10002965m	11.799	12.6732	20.0882	14.7544	19.1873	33.5582
Ciclev10002966m	14.2463	8.87514	10.826	6.08945	10.7477	8.42071
Ciclev10002967m	1.28853	1.24561	0.963123	0	0.388836	0
Ciclev10002968m	8.17891	1.88249	3.05669	7.17262	5.46512	1.16961
Ciclev10002969m	0	0	0	0.172157	0.095207	0.0902344
Ciclev10002971m	0	0	0	0	0	0
Ciclev10002972m	1.67119	0	0.312285	0.227978	0.252154	0
Ciclev10002973m	115.465	161.288	197.627	57.476	52.459	99.6833
Ciclev10002974m	0	0.189588	0	0	0.177548	0
Ciclev10002976m	1.09859	0.530997	3.07931	1.57359	1.24319	0.942608
Ciclev10002977m	102.514	126.641	157.433	110.767	220.847	159.33
Ciclev10002978m	61.7222	25.5712	17.9746	206.343	118.285	52.9587
Ciclev10002979m	1002.46	645.282	202.081	1111.33	891.755	606.685
Ciclev10002980m	4.44752	3.16795	7.61096	6.13102	7.41693	20.0844
Ciclev10002981m	237.703	284.331	324.907	8.98614	3.69826	2.40976
Ciclev10002982m	205.888	155.461	167.903	161.477	102.932	94.3918
Ciclev10002984m	314.941	360.047	121.015	223.764	338.609	439.221
Ciclev10002985m	0	0	0	0	0	0
Ciclev10002986m	0.825587	0	0	0	0	0
Ciclev10002987m	31.8831	34.7084	37.3571	24.6858	28.0837	22.1807
Ciclev10002988m	0.168138	1.30029	5.08987	7.84439	25.4199	25.6792
Ciclev10002989m	0	0	0	0	0	0
Ciclev10002990m	0.778943	0	0	1.27513	0	1.00252
Ciclev10002991m	0	0	0	0	1.38685	0.438138
Ciclev10002992m	0	0	0	0	0	0
Ciclev10002993m	6.47234	6.84699	11.022	3.39847	3.59303	5.23903
Ciclev10002994m	0	0	0	0.249666	0.276142	0.785159
Ciclev10002996m	23.7776	21.7382	13.8462	28.0614	31.3709	19.9271
Ciclev10002998m	0	0.224756	6.64726	0	1.68386	25.3352
Ciclev10002999m	51.1836	76.0752	62.5563	53.3423	68.7394	54.5988
Ciclev10003000m	10.1486	8.05583	8.88079	12.4262	11.6525	8.49532
Ciclev10003001m	1.25567	1.21385	0.563138	3.49442	3.86499	0.430956
Ciclev10003002m	0	0	0	0	0	0
Ciclev10003003m	0	0	0	0	0	0
Ciclev10003006m	18.4544	14.8664	12.2945	11.0551	7.99018	7.45812
Ciclev10003007m	3.55502	3.88485	1.03978	1.64466	3.21836	3.05027
Ciclev10003008m	0	0	0	0	0	0
Ciclev10003010m	0	0	0	2.21775	3.01899	1.52007
Ciclev10003011m	1.94383	0.13422	0.467013	4.09121	3.89658	0
Ciclev10003012m	33.0281	26.359	20.6682	35.5208	29.3788	32.6224
Ciclev10003013m	0	0	0	0	0	0
Ciclev10003014m	11.1864	11.3545	14.737	5.49367	8.10167	6.71871
Ciclev10003015m	0.874829	0.676549	0.784677	0.859258	0	0
Ciclev10003016m	0.716223	5.19273	4.81812	0	0	0
Ciclev10003017m	6.70733	13.6882	0	9.75993	3.71076	6.71417
Ciclev10003018m	0	0	0	0	0	0
Ciclev10003019m	3.68363	2.20438	5.70338	4.73794	6.82837	3.46163
Ciclev10003020m	36.9303	26.18	15.7342	20.3532	33.2101	8.23856
Ciclev10003021m	9.24288	9.92776	7.48438	13.4494	3.02162	0.440586
Ciclev10003022m	0	0	0	0	0	0
Ciclev10003023m	13.4448	22.7652	37.1571	18.7848	19.1488	30.4928
Ciclev10003024m	0	0	0	0	0	0
Ciclev10003025m	163.581	115.918	125.56	82.7272	80.8198	183.414
Ciclev10003026m	12.7243	16.8157	19.1421	18.7203	19.8306	19.3477
Ciclev10003027m	15.7706	7.23763	29.1124	7.17124	10.4554	9.22596
Ciclev10003029m	0	0	0	0	0	0
Ciclev10003030m	0	0.115795	0	0	0	0
Ciclev10003031m	0.260629	1.76363	1.46107	3.41321	4.01111	2.01262
Ciclev10003032m	7.2969	4.45505	4.95177	3.61495	2.25991	0.16476
Ciclev10003033m	0	0	0	0	0	0
Ciclev10003034m	0	0	0	3.15532	1.84761	0.194568
Ciclev10003035m	0	0	0	0	0.147363	0
Ciclev10003036m	25.7503	19.6643	18.0103	11.3642	24.0425	11.151
Ciclev10003037m	3.56568	4.40437	8.66188	0.16214	0.179334	0.169967
Ciclev10003038m	12.8526	5.46675	1.46721	5.73809	3.30023	0
Ciclev10003039m	0.792373	0.382989	0	2.43209	0.717335	1.35974
Ciclev10003040m	2.84147	1.43312	1.80068	1.61791	5.03292	1.59002
Ciclev10003041m	0.667666	0	1.87144	1.22959	1.35998	1.28895
Ciclev10003042m	0	0	0	0	0	0
Ciclev10003043m	0.880274	0.638213	0.370107	0.630442	0.099614	0.472056
Ciclev10003044m	0.306657	0.0592883	0	0.250999	0.111047	0.15787
Ciclev10003046m	107.331	96.7968	99.3038	94.1005	85.7125	69.4435
Ciclev10003047m	139.973	141.173	131.564	100.629	117.636	125.703
Ciclev10003048m	2.12814	4.26144	2.38604	5.22565	3.99082	1.69555
Ciclev10003049m	17.6477	24.0666	18.3731	29.0184	31.3824	29.3377
Ciclev10003050m	4.56407	2.29793	5.11717	2.95743	5.07873	3.50813
Ciclev10003051m	9.49212	1.14699	0	11.8482	0.21483	0
Ciclev10003052m	8.88442	1.90855	1.47572	5.11727	0.595782	0
Ciclev10003053m	24.4103	37.1437	38.0118	5.54996	13.5047	21.7202
Ciclev10003055m	0	0	0	0	0	0
Ciclev10003056m	0	0	0	0	0	0
Ciclev10003057m	26.7951	30.8475	25.1263	35.4897	33.9606	45.1453
Ciclev10003062m	2.76483	4.09819	1.85994	0.905207	1.66867	1.10706
Ciclev10003063m	12.475	16.4447	29.9717	0	0	0
Ciclev10003065m	0.60737	0	0	1.32569	0	0
Ciclev10003066m	107.832	127.862	164.887	103.307	118.728	206.78
Ciclev10003067m	0	0.267095	0.309782	0.226151	0.500266	0.711206
Ciclev10003068m	2.04762	0.879737	8.16271	0.18622	0	0
Ciclev10003069m	0	0	0	0	0	0
Ciclev10003070m	2.3075	1.11532	0.646784	0.472172	0	0.989936
Ciclev10003071m	0	0.885583	0	1.12474	2.90271	3.53713
Ciclev10003072m	22.3751	2.47197	2.62812	18.6628	9.25994	2.92544
Ciclev10003073m	0	0	0	0	0	0
Ciclev10003074m	0	0	0	0	0	0
Ciclev10003075m	8.1401	20.1642	10.2674	44.1403	39.6096	24.8817
Ciclev10003076m	2.38168	1.27908	0.296701	14.0791	11.2598	6.13057
Ciclev10003077m	0	0	0	0	0	0
Ciclev10003078m	1.48428	0.478278	0.739623	10.259	8.3609	5.94317
Ciclev10003079m	10.9298	11.2022	9.15381	2.26345	1.31135	2.14675
Ciclev10003080m	12.3101	13.8473	16.1859	0	0	0
Ciclev10003081m	0.87041	0.673132	1.17107	1.85232	0.630385	0.298731
Ciclev10003082m	0.125911	0.121717	0.42351	0.206117	0.113988	0.216068
Ciclev10003083m	225.087	185.312	236.229	130.047	134.718	216.096
Ciclev10003084m	2.90055	1.49543	2.38484	3.0072	3.15104	0.829575
Ciclev10003086m	9.03098	6.75131	17.1457	2.75963	3.37931	2.89286
Ciclev10003088m	24.9677	32.4771	35.4034	15.7778	25.761	31.0314
Ciclev10003089m	1.87582	2.41778	1.4021	0	0	0
Ciclev10003090m	0.516378	1.74712	9.84225	1.26797	0.934954	7.08898
Ciclev10003091m	0.361871	0.174908	0	0.148096	0	0
Ciclev10003092m	0	0	0	0	0	0
Ciclev10003093m	0	0	0	0	0	0
Ciclev10003094m	11.6842	4.01598	4.3667	11.4762	7.28683	2.89617
Ciclev10003095m	0	0.115095	0.800939	0.292355	1.29343	1.12372
Ciclev10003096m	0	0	0	0	0	0
Ciclev10003097m	2.27513	1.75947	0	2.23464	2.47161	3.9042
Ciclev10003098m	0.251135	0	0	0	0	0
Ciclev10003099m	0	0	0	0	0	0
Ciclev10003100m	0	0	0	0	0	0
Ciclev10003101m	19.0271	20.94	134.889	49.1169	99.111	117.544
Ciclev10003102m	0	0	0	0	0	0
Ciclev10003103m	0	0	0	0	0	0
Ciclev10003104m	0.273557	0.132222	0.153354	0	0.247651	0
Ciclev10003105m	0	0	0	0	0	0
Ciclev10003106m	1.84651	0.991668	1.38019	5.5417	3.52903	1.58434
Ciclev10003107m	0	0	0	0	0	0
Ciclev10003108m	0	0	0	0	0.174813	0
Ciclev10003109m	0.483765	0	0	0.0989905	0	0.10377
[truncated: 23,780 more rows]
